# Supplementary material for: Association between pharmaceutical modulation of oestrogen in postmenopausal women in Sweden and death due to COVID-19: a cohort study
Source: PubMed Central journal article supplement (PMC8844968; doi:10.1136/bmjopen-2021-053032), 2022-01-14
Supplement: bmjopen-2021-053032.draft_revisions.pdf [file bmjopen-2021-053032.draft_revisions.pdf]

# BMJ Open

BMJ Open is committed to open peer review. As part of this commitment we make the peer review history of every article we publish publicly available.

When an article is published we post the peer reviewers' comments and the authors' responses online. We also post the versions of the paper that were used during peer review. These are the versions that the peer review comments apply to.

The versions of the paper that follow are the versions that were submitted during the peer review process. They are not the versions of record or the final published versions. They should not be cited or distributed as the published version of this manuscript.

BMJ Open is an open access journal and the full, final, typeset and author-corrected version of record of the manuscript is available on our site with no access controls, subscription charges or pay-per-view fees (<http://bmjopen.bmj.com>).

If you have any questions on BMJ Open's open peer review process please email [info.bmjopen@bmj.com](mailto:info.bmjopen@bmj.com)

# BMJ Open

## Pharmaceutical modulation of oestrogen during COVID-19 – a nationwide cohort study

|                               |                                                                                                                                                                                                                                                                                                                                                                                                                                                                                                                                                                         |
|-------------------------------|-------------------------------------------------------------------------------------------------------------------------------------------------------------------------------------------------------------------------------------------------------------------------------------------------------------------------------------------------------------------------------------------------------------------------------------------------------------------------------------------------------------------------------------------------------------------------|
| Journal:                      | <i>BMJ Open</i>                                                                                                                                                                                                                                                                                                                                                                                                                                                                                                                                                         |
| Manuscript ID                 | bmjopen-2021-053032                                                                                                                                                                                                                                                                                                                                                                                                                                                                                                                                                     |
| Article Type:                 | Original research                                                                                                                                                                                                                                                                                                                                                                                                                                                                                                                                                       |
| Date Submitted by the Author: | 03-May-2021                                                                                                                                                                                                                                                                                                                                                                                                                                                                                                                                                             |
| Complete List of Authors:     | Sund, Malin; Umeå Universitet Medicinska fakulteten, Department of Surgical and Perioperative Sciences<br>Fonseca-Rodríguez, Osvaldo; Umeå Universitet Medicinska fakulteten, Department of Clinical Microbiology<br>Josefsson, Andreas; Umeå Universitet Medicinska fakulteten, Department of Surgical and Perioperative Sciences/ Urology; University of Gothenburg, Department of Urology<br>Welen, Karin; University of Gothenburg, Department of Urology<br>Fors Connolly, Anne-Marie; Umeå Universitet Medicinska fakulteten, Department of Clinical Microbiology |
| Keywords:                     | COVID-19, Sex steroids & HRT < DIABETES & ENDOCRINOLOGY, EPIDEMIOLOGY, Epidemiology < INFECTIOUS DISEASES                                                                                                                                                                                                                                                                                                                                                                                                                                                               |
|                               |                                                                                                                                                                                                                                                                                                                                                                                                                                                                                                                                                                         |

SCHOLARONE™  
Manuscripts

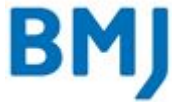

I, the Submitting Author has the right to grant and does grant on behalf of all authors of the Work (as defined in the below author licence), an exclusive licence and/or a non-exclusive licence for contributions from authors who are: i) UK Crown employees; ii) where BMJ has agreed a CC-BY licence shall apply, and/or iii) in accordance with the terms applicable for US Federal Government officers or employees acting as part of their official duties; on a worldwide, perpetual, irrevocable, royalty-free basis to BMJ Publishing Group Ltd ("BMJ") its licensees and where the relevant Journal is co-owned by BMJ to the co-owners of the Journal, to publish the Work in this journal and any other BMJ products and to exploit all rights, as set out in our [licence](#).

The Submitting Author accepts and understands that any supply made under these terms is made by BMJ to the Submitting Author unless you are acting as an employee on behalf of your employer or a postgraduate student of an affiliated institution which is paying any applicable article publishing charge ("APC") for Open Access articles. Where the Submitting Author wishes to make the Work available on an Open Access basis (and intends to pay the relevant APC), the terms of reuse of such Open Access shall be governed by a Creative Commons licence – details of these licences and which [Creative Commons](#) licence will apply to this Work are set out in our licence referred to above.

Other than as permitted in any relevant BMJ Author's Self Archiving Policies, I confirm this Work has not been accepted for publication elsewhere, is not being considered for publication elsewhere and does not duplicate material already published. I confirm all authors consent to publication of this Work and authorise the granting of this licence.

1  
2  
3 **1 Pharmaceutical modulation of oestrogen during COVID-19 – a nationwide cohort study**  
4  
5  
6

7  
8 3 Malin Sund MD PhD<sup>1,2</sup>, Osvaldo Fonseca-Rodríguez DVM PhD<sup>3</sup>, Andreas Josefsson MD PhD<sup>4,6</sup>,  
9  
10 4 Karin Welen PhD<sup>6</sup>, Anne-Marie Fors Connolly MD PhD<sup>3\*</sup>  
11  
12

13  
14 6 1. Department of Surgical and Perioperative Sciences/ Surgery, Umeå University, Umeå, Sweden

15  
16 7 2. Department of Surgery, University of Helsinki and Helsinki University Hospital, Helsinki, Finland

17  
18 8 3. Department of Clinical Microbiology, Umeå University, Umeå, Sweden

19  
20 9 4. Department of Surgical and Perioperative Sciences/ Urology, Umeå University, Umeå, Sweden

21  
22 10 5. Wallenberg Center for Molecular Medicine, Umeå University, Umeå Sweden

23  
24 11 6. Department of Urology, Sahlgrenska Center for Cancer Research, Institute of Clinical Sciences,  
25  
26 12 Sahlgrenska Academy, University of Gothenburg, Gothenburg, Sweden  
27  
28

29  
30 14 \* Corresponding author:

31  
32 15 Anne-Marie Fors Connolly

33  
34 16 Department of Clinical Microbiology

35  
36 17 Umeå University

37  
38 18 901 85 Umeå

39  
40 19 Sweden

41  
42 20 E-mail: [anne-marie.fors.connolly@umu.se](mailto:anne-marie.fors.connolly@umu.se)  
43  
44  
45

46  
47 22 Number of words text: 1406

48  
49 23 Number of words abstract: 298  
50  
51  
52  
53  
54  
55  
56  
57  
58  
59  
60

1  
2  
3 24 **Abstract**  
4

5 25 Objective: Determine if oestrogen augmentation decreases the risk of death following COVID-19.  
6  
7 26

8  
9 27 Design: Nationwide registry-based study  
10  
11 28

12  
13 29 Participants: Postmenopausal women between 50 and 80 years of age with verified COVID-19 were  
14  
15 30 divided into three groups: 1) Women with previously diagnosed breast cancer and receiving endocrine  
16  
17 31 therapy (decreased systemic oestrogen levels); 2) women receiving hormone replacement therapy  
18  
19 32 (HRT; increased systemic oestrogen levels) and 3) control group not fulfilling requirements for group  
20  
21 33 1 or 2 (postmenopausal oestrogen levels).  
22  
23 34

24  
25 35 Main outcome measures: The main outcome was death following COVID-19, and the exposure was  
26  
27 36 pharmaceutical modulation of oestrogen levels. Adjustments were made for potential confounders  
28  
29 37 such as age, annual disposable income (richest group as the reference category), highest level of  
30  
31 38 education (primary, secondary and tertiary (reference)) and the weighted Charlson Comorbidity Index  
32  
33 39 (wCCI).  
34  
35 40

36  
37 41 Results: From a nationwide cohort consisting of 49,853 women diagnosed with COVID-19 between  
38  
39 42 the 4<sup>th</sup> of February to 14<sup>th</sup> of September 2020 in Sweden, 16,693 were between 50 to 80 years of age.  
40  
41 43 We included 14,685 women in the study with 11,923 (81%) in the control group, 227 (2%) women in  
42  
43 44 group 1 and 2,535 (17%) women in group 2. The unadjusted odds ratio (OR) for death following  
44  
45 45 COVID-19 was 2.35 (95% CI 1.51-3.65) for group 1 and 0.45 (0.34-0.6) for group 2. Only the  
46  
47 46 adjusted OR for death remained significant for group 2 with OR 0.47 (0.34-0.63). The risk of death  
48  
49 47 due to COVID-19 was significantly associated with: Age OR 1.15 (1.14-1.17); annual income  
50  
51 48 (poorest 2.79 (1.96-3.97); poor 2.43 (1.71-3.46) and middle 1.64 (1.11-2.41)); education (primary 1.4  
52  
53 49 (1.07-1.81)) and wCCI 1.13 (1.1-1.16).  
54  
55 50  
56  
57  
58  
59  
60

1  
2  
3 51 Conclusions: Oestrogen supplementation in post-menopausal women is associated with a decreased  
4  
5 52 risk of dying from COVID-19 in this nationwide cohort study. These findings are limited by the  
6  
7 53 retrospective and non-randomized design. Further randomized intervention trials are warranted.  
8  
9  
10  
11  
12  
13  
14  
15  
16  
17  
18  
19  
20  
21  
22  
23  
24  
25  
26  
27  
28  
29  
30  
31  
32  
33  
34  
35  
36  
37  
38  
39  
40  
41  
42  
43  
44  
45  
46  
47  
48  
49  
50  
51  
52  
53  
54  
55  
56  
57  
58  
59  
60

For peer review only

1  
2  
3 54 **Strengths and limitations of the study**  
4  
5

- 6 55 • This study is based on all diagnosed COVID-19 patients in Sweden  
7  
8 56 • Swedish registry data is well-validated and due to historical registry data and cross-linkage  
9  
10 57 with the registries of Statistics Sweden, the confounding and/or effect modifying effects of  
11  
12 58 socioeconomic variables and comorbidities could be adjusted for  
13  
14 59 • It investigates the effect of pharmaceutical modulation of oestrogen in post-menopausal  
15  
16 60 women on death due to COVID-19  
17  
18  
19 61 • The findings are limited by the retrospective and non-randomized design.  
20  
21  
22  
23  
24  
25  
26  
27  
28  
29  
30  
31  
32  
33  
34  
35  
36  
37  
38  
39  
40  
41  
42  
43  
44  
45  
46  
47  
48  
49  
50  
51  
52  
53  
54  
55  
56  
57  
58  
59  
60

## 62 Introduction

63 The coronavirus disease 2019 (COVID-19) pandemic has swept across the globe causing enormous  
64 strain on societies and health care systems. Although women are infected, they appear to be  
65 protected from poor outcome when compared to men even after adjustment for confounding risk  
66 factors<sup>1 2</sup>. Similar epidemiological findings have also been described for SARS-CoV and MERS-  
67 CoV infections<sup>3 4 5</sup>. This implies biological differences between the sexes in terms of sensitivity to  
68 severe COVID-19, and oestrogen has been identified as a potential therapeutic candidate.

69  
70 The majority of breast cancer (BC) patients have oestrogen receptor (ER) positive cancer<sup>6</sup>, and are  
71 usually given adjuvant endocrine therapy after surgery in order to reduce the risk of cancer  
72 recurrences, leading to *reduced* systemic oestrogen levels. On the other hand, systemic oestrogen  
73 levels are *augmented* in women taking hormone replacement therapy (HRT) for relieving menopausal  
74 symptoms<sup>7</sup>. We use the opposing effects of endocrine therapy in BC patients and HRT in modulating  
75 systemic oestrogen levels in postmenopausal women as a model to test the hypothesis whether  
76 increased oestrogen levels are protective towards COVID-19 death in a nationwide cohort.



## 77 **Materials and methods**

### 78 *Patients and public involvement statement*

79 All data from the Swedish registries were pseudonymized and therefore patients were not involved  
80 in the study.

### 82 *Participants and sources of data*

83 The personal identification numbers (PINs) from all diagnosed COVID-19 individuals in Sweden  
84 (SmiNet) between the 1<sup>st</sup> of February to 14<sup>th</sup> of September 2020 were cross-linked with the LISA  
85 Register (Longitudinal integrated database for health insurance and labor marker studies)  
86 administered by Statistics Sweden; and the following healthcare registers administered by the  
87 Swedish National Board of Health and Welfare: Patient; Cancer; Prescribed pharmaceutical and  
88 Causes of Death. Post-menopausal women between the ages of 50-80 years of age were stratified into  
89 three groups: *Oestrogen decrease (group 1)*: BC as identified by international classification of  
90 diseases (ICD) version 10 code C50, and the following treatment: tamoxifen or fulvestrant  
91 (anatomical therapeutic chemical (ATC): L02BA01, L02BA03) or an aromatase inhibitor (AI; ATC  
92 L02BG03, L02BG04, and L02BG06). *Augmented oestrogen (group 2)*: Drugs classified as HRT  
93 (ATC codes: G03CA03, G03CA04, G03CC07, G03CX01, G03FA, G03FB). All ATC codes for  
94 group 1 and 2 were identified from the Prescribed Pharmaceutical Register with at least two  
95 consecutive withdrawals and at least one time should be during the period 2019-07-01 - to the latest  
96 date. *Native oestrogen (control group)*: No BC diagnosis, and no prescription of the above-mentioned  
97 pharmaceuticals at any time point during 2019 and 2020. Ethical permit was granted by the Swedish  
98 Ethical Review Authority.

### 100 *Outcome, confounders and effect modifiers*

101 The outcome was death due to COVID-19 as identified by the ICD-10 code U07 as the main or  
102 contributing cause of death from the Cause of Death Register. Potential confounders and effect  
103 modifiers were included in the model and consisted of the weighted Charlson comorbidity index  
104 (wCCI)<sup>8</sup>, age at COVID-19 diagnosis, income (divided into quintiles with the richest group as the

1  
2  
3 105 reference) and education (primary, secondary and tertiary (=reference)). The wCCI was calculated  
4  
5 106 using the Patient and Cancer Registers, and up to two months prior to the COVID-19 date in order not  
6  
7 107 to include complications due to COVID-19 as a comorbidity. If there was no information regarding  
8  
9 108 diagnosis codes required for wCCI scoring, the individual was assigned a wCCI of zero. Information  
10  
11 109 regarding income and education was retrieved from the LISA-register.  
12  
13  
14 110

### 15 111 *Statistical methods*

16  
17  
18 112 The distribution of continuous and categorical variables in the three groups was tested using ANOVA  
19  
20 113 and the  $\chi^2$  test, respectively. Each variable was then analyzed with univariate logistic regression  
21  
22 114 models, followed by a multivariable regression model to compare the control group with group 1 and  
23  
24 115 2, respectively, and adjusting for confounders. Descriptive analyses and logistic regression models  
25  
26 116 were performed in R statistical software version 4.0.2 using *finalfit* package 1.0.2.  
27  
28  
29  
30  
31  
32  
33  
34  
35  
36  
37  
38  
39  
40  
41  
42  
43  
44  
45  
46  
47  
48  
49  
50  
51  
52  
53  
54  
55  
56  
57  
58  
59  
60

1  
2  
3 117 **Results**

4  
5 118 *Participants*

6  
7 119 During the study period a total of 49,853 women of all ages were diagnosed with COVID-19 in  
8  
9 120 Sweden, and a total of 14,685 women between the ages of 50-80 years of age were included in our  
10  
11 121 study (Figure 1). Characteristics of these groups are shown in Table 1. Individuals with decreased  
12  
13 122 oestrogen due to adjuvant endocrine therapy for BC (group 1) were older with a higher comorbidity  
14  
15 123 index. A larger proportion of women in group 2 (increased levels of systemic oestrogen due to HRT)  
16  
17 124 had high income and tertiary level of education (Table 1).  
18  
19

20 125

21  
22 126 *Oestrogen augmentation protects against death due to COVID-19*

23  
24 127 Pharmaceutically decreasing systemic oestrogen levels increased the odds of dying due to COVID-19  
25  
26 128 (group 1; odds ratio (OR) 2.35 95% confidence intervals (CI) 1.51-3.65), but following adjustment for  
27  
28 129 confounders this association was no longer significant (Figure 2). Interestingly, augmentation of  
29  
30 130 systemic oestrogen levels decreased the odds of dying due to COVID-19 with OR 0.45 (95% CI:  
31  
32 131 0.34-0.6), which remained significant even after adjustment for confounders (0.47 (95% CI: 0.34-  
33  
34 132 0.63)). As expected, higher age and wCCI increased the odds of dying due to COVID-19. For every  
35  
36 133 year increase in age the odds of dying was 1.15 (95% CI: 1.14-1.17) and for every increase in wCCI  
37  
38 134 the odds of dying was 1.13 (95% CI: 1.10-1.16) (Figure 2). Furthermore, low income and having only  
39  
40 135 primary level education were also factors that increased the odds of dying due to COVID-19 (Figure  
41  
42  
43 136 2).  
44  
45  
46  
47  
48  
49  
50  
51  
52  
53  
54  
55  
56  
57  
58  
59  
60

## 137 **Discussion**

### 138 Principal findings

139 The major finding of this nationwide registry-based study is that pharmaceutically augmenting  
140 oestrogen levels is associated with decreased odds of death due to COVID-19.

141

### 142 Comparison with related studies

143 There are several possible biological explanations for the lower risk experienced by women. These  
144 include mechanisms directly involved in viral internalization and reproduction, where oestrogen has  
145 been shown to decrease expression of vital proteins such as ACE2 and TMPRSS2<sup>9,10</sup>, inherent sex-  
146 linked differences in the immune system and direct oestrogen effects<sup>11</sup>. Our findings are supported by  
147 *in vitro* studies where 17 $\beta$ -estradiol treatment reduced viral load of SARS-CoV-2<sup>9</sup>. Previous  
148 experimental studies in mice on SARS-CoV have moreover shown that female mice were less  
149 susceptible to infection, and that this protection was lost upon oophorectomy thus indicating a direct  
150 protective role of oestrogen signalling<sup>12</sup>. Furthermore, Barh et al. showed using a multiomics  
151 approach on SARS-CoV-2 infected host interactome, proteome, transcriptome, and bibliome datasets  
152 that oestrogen modulation could be a potential therapeutic option in COVID-19<sup>13</sup>. Our findings are  
153 further verified by a smaller study of women taking HRT (n = 439) that showed similar results with  
154 oestrogen augmentation being associated lower risk of COVID-19 death, although in that study the  
155 risk selection bias was more difficult to discern since the cohort was neither population-based nor  
156 adjusted for central confounders<sup>14</sup>. In our study the effect of increased systemic oestrogen levels on  
157 reducing the risk of COVID-19 death remained significant also after adjusting for education level and  
158 income, both factors known to influence COVID-19 outcome<sup>15</sup>, which further supports the protective  
159 role of oestrogen in women.

160 The hypothetic inverse, worsening, effect of reduced systemic oestrogen levels in women with a  
161 previous BC receiving adjuvant endocrine therapy was initially significant but not after adjusting for  
162 confounders. This population differs from the control group in that they all have been diagnosed with  
163 BC and it has been shown that patients, both men and women, with any cancer form are harder hit by  
164 COVID-19<sup>16</sup>. However, BC patients were in a previous study shown to be healthier compared to the

1  
2  
3 165 background population in terms of ischemic cardiac disease and CCI <sup>17</sup>, and the wCCI adjustments  
4  
5 166 may therefore overcompensate for this cancer-related vulnerability. Although not significant, a trend  
6  
7 167 towards worse outcome remained and thus a larger population of BC patients on endocrine therapy is  
8  
9 168 likely needed to verify the finding. Thus, this study cannot exclude an increased risk for death from  
10  
11 169 COVID-19 if systemic oestrogen levels are pharmaceutically decreased.  
12

13  
14 170

#### 15 171 Strengths and limitations

16 172 Strengths of this study are that this is a nationwide cohort in a country with high COVID-19 incidence  
17  
18 173 using well validated registry data. A weakness is that the level of oestrogen modulation cannot be  
19  
20 174 exactly measured in each individual, and that the number of BC women on anti-oestrogen medication  
21  
22 175 ended up being too small to show significance although there was a clear trend. The HRT group,  
23  
24 176 however, proved large enough to show the clear protective effect.  
25  
26  
27

28 177

#### 29 178 Implications and conclusion

30 179 The present study shows an association between oestrogen levels and COVID-19 death.  
31  
32 180 Consequently, drugs increasing oestrogen levels may have a role in therapeutic efforts to alleviate  
33  
34 181 COVID-19 severity in post-menopausal women and could be studied in randomized control trials.  
35  
36  
37  
38  
39  
40  
41  
42  
43  
44  
45  
46  
47  
48  
49  
50  
51  
52  
53  
54  
55  
56  
57  
58  
59  
60

1  
2  
3 **182 Acknowledgments:**  
4

5 **183** We would like to thank Wolfgang Lohr for data management and Dr- Chloé Jacquet for helping us  
6  
7 **184** design Figure 2.  
8

9  
10 **185**

11 **186 Funding:**  
12

13  
14 **187** This study was funded by:

15  
16 **188** AMFC: Central ALF-funding, Region Västerbotten (RV-836351), Base unit ALF-funding (RV-  
17  
18 **189** 939769); Strategic Funding during 2020 from the Department of Clinical Microbiology, Umeå  
19  
20 **190** University; Stroke Research in Northern Sweden; and Molecular Infection Medicine Sweden  
21  
22 **191** (MIMS).  
23

24 **192** AJ: Knut and Alice Wallenberg Foundation  
25  
26 **193**

27  
28 **194 Contributors**  
29

30 **195** MS and KW conceptualized the study. MS and AMFC designed the study. OFR and AMFC prepared  
31  
32 **196** the study data. OFR performed the statistical analysis. All authors contributed to interpretation of the  
33  
34 **197** results. MS wrote the first draft of the manuscript. All authors contributed to critical revision of the  
35  
36 **198** manuscript. All authors approved the final manuscript. AMFC is the guarantor of this study. The  
37  
38 **199** corresponding author attests that all authors meet the criteria for authorship and that all have been  
39  
40 **200** included.  
41  
42

43 **201**

44  
45 **202 Competing interests**  
46

47 **203** All authors have completed the ICMJE uniform disclosure form at [www.icmje.org/coi\\_disclosure.pdf](http://www.icmje.org/coi_disclosure.pdf)  
48  
49 **204** and declare: no support from any organisation for the submitted work; no financial relationships with  
50  
51 **205** any organisations that might have an interest in the submitted work in the previous three years; no  
52  
53 **206** other relationships or activities that could appear to have influenced the submitted work.  
54

55  
56 **207**

57  
58 **208 Ethical approval**  
59

60 **209** Ethical approval was obtained by the Swedish Ethical Review Authority (number 2020-02150)

210

211 **Data sharing**

212 The study protocol (R script) is available upon request. The study used secondary registry data which  
213 is regulated by the Public Access to Information and Secrecy Act (2009:400) and is protected by strict  
214 confidentiality. For the purpose of research though, after formal application to access personal data  
215 the responsible authority can grant access to data, though this is contingent on vetting by the Ethical  
216 Review Authority of Sweden, according to the Act (2003:460) concerning the Ethical Review of  
217 Research Involving Humans. This means that the aggregated registry data cannot be shared.

219

220 **References**

- 221 1. Williamson EJ, Walker AJ, Bhaskaran K, et al. Factors associated with COVID-19-related death  
222 using OpenSAFELY. *Nature* 2020;584(7821):430-36. doi: 10.1038/s41586-020-2521-4
- 223 2. Abate BB, Kassie AM, Kassaw MW, et al. Sex difference in coronavirus disease (COVID-19): a  
224 systematic review and meta-analysis. *BMJ Open* 2020;10(10):e040129. doi:  
225 10.1136/bmjopen-2020-040129 [published Online First: 2020/10/09]
- 226 3. Alghamdi IG, Hussain, II, Almalki SS, et al. The pattern of Middle East respiratory syndrome  
227 coronavirus in Saudi Arabia: a descriptive epidemiological analysis of data from the Saudi  
228 Ministry of Health. *Int J Gen Med* 2014;7:417-23. doi: 10.2147/IJGM.S67061 [published  
229 Online First: 2014/09/05]
- 230 4. Leong HN, Earnest A, Lim HH, et al. SARS in Singapore--predictors of disease severity. *Ann Acad*  
231 *Med Singap* 2006;35(5):326-31. [published Online First: 2006/07/11]
- 232 5. Karlberg J, Chong DS, Lai WY. Do men have a higher case fatality rate of severe acute respiratory  
233 syndrome than women do? *Am J Epidemiol* 2004;159(3):229-31. doi: 10.1093/aje/kwh056  
234 [published Online First: 2004/01/27]
- 235 6. Sung H, Ferlay J, Siegel RL, et al. Global cancer statistics 2020: GLOBOCAN estimates of  
236 incidence and mortality worldwide for 36 cancers in 185 countries. *CA Cancer J Clin* 2021  
237 doi: 10.3322/caac.21660
- 238 7. Delgado BJ, Lopez-Ojeda W. Oestrogen. StatPearls. Treasure Island (FL)2021.
- 239 8. Ludvigsson JF, Appelros P, Askling J, et al. Adaptation of the Charlson Comorbidity Index for  
240 Register-Based Research in Sweden. *Clin Epidemiol* 2021;13:21-41. doi:  
241 10.2147/CLEP.S282475
- 242 9. Lemes RMR, Costa AJ, Bartolomeo CS, et al. 17beta-estradiol reduces SARS-CoV-2 infection in  
243 vitro. *Physiol Rep* 2021;9(2):e14707. doi: 10.14814/phy2.14707



- 1  
2  
3 244 10. Stelzig KE, Canepa-Escaro F, Schiliro M, et al. Oestrogen regulates the expression of SARS-  
4  
5 245 CoV-2 receptor ACE2 in differentiated airway epithelial cells. *Am J Physiol Lung Cell Mol*  
6  
7 246 *Physiol* 2020;318(6):L1280-L81. doi: 10.1152/ajplung.00153.2020  
8  
9 247 11. Klein SL, Flanagan KL. Sex differences in immune responses. *Nat Rev Immunol*  
10  
11 248 2016;16(10):626-38. doi: 10.1038/nri.2016.90  
12  
13 249 12. Channappanavar R, Fett C, Mack M, et al. Sex-Based Differences in Susceptibility to Severe  
14  
15 250 Acute Respiratory Syndrome Coronavirus Infection. *J Immunol* 2017;198(10):4046-53. doi:  
16  
17 251 10.4049/jimmunol.1601896 [published Online First: 2017/04/05]  
18  
19 252 13. Barh D, Tiwari S, Weener ME, et al. Multi-omics-based identification of SARS-CoV-2 infection  
20  
21 253 biology and candidate drugs against COVID-19. *Comput Biol Med* 2020;126:104051. doi:  
22  
23 254 10.1016/j.combiomed.2020.104051  
24  
25 255 14. Seeland U, Coluzzi F, Simmaco M, et al. Evidence for treatment with estradiol for women with  
26  
27 256 SARS-CoV-2 infection. *BMC Med* 2020;18(1):369. doi: 10.1186/s12916-020-01851-z  
28  
29 257 15. Drefahl S, Wallace M, Mussino E, et al. A population-based cohort study of socio-demographic  
30  
31 258 risk factors for COVID-19 deaths in Sweden. *Nat Commun* 2020;11(1):5097. doi:  
32  
33 259 10.1038/s41467-020-18926-3  
34  
35 260 16. Zhang H, Han H, He T, et al. Clinical Characteristics and Outcomes of COVID-19-Infected  
36  
37 261 Cancer Patients: A Systematic Review and Meta-Analysis. *J Natl Cancer Inst* 2020 doi:  
38  
39 262 10.1093/jnci/djaa168  
40  
41 263 17. Wennstig AK, Wadsten C, Garmo H, et al. Long-term risk of ischemic heart disease after adjuvant  
42  
43 264 radiotherapy in breast cancer: results from a large population-based cohort. *Breast Cancer*  
44  
45 265 *Res* 2020;22(1):10. doi: 10.1186/s13058-020-1249-2  
46  
47  
48  
49  
50  
51  
52  
53  
54  
55  
56  
57  
58  
59  
60

1  
2  
3 267 **Figure legends**  
4

5 268 Figure 1: Flow chart of the study  
6

7 269  
8

9 270 Figure 2: Oestrogen augmentation is associated with decreased odds of dying due to COVID-19. Crude  
10  
11 271 and adjusted logistic regression models. Statistical significance: ( $p < 0.05$  \*,  $p < 0.01$  \*\*,  $p < 0.001$   
12  
13  
14 272 \*\*\*). OR odds ratio; CI confidence intervals; wCCI weighted Charlson Comorbidity Index.  
15  
16  
17  
18  
19  
20  
21  
22  
23  
24  
25  
26  
27  
28  
29  
30  
31  
32  
33  
34  
35  
36  
37  
38  
39  
40  
41  
42  
43  
44  
45  
46  
47  
48  
49  
50  
51  
52  
53  
54  
55  
56  
57  
58  
59  
60

For peer review only

273 **Table 1.** Characteristics of the study population

| <b>Variable</b>                |           | <b>Native oestrogen (control group)</b> | <b>Oestrogen decrease (group 1)</b> | <b>Augmented oestrogen (group 2)</b> | <b>p-value</b> |
|--------------------------------|-----------|-----------------------------------------|-------------------------------------|--------------------------------------|----------------|
| <b>Total N (%)</b>             |           | 11,923 (81.2)                           | 227 (1.5)                           | 2,535 (17.3)                         |                |
| <b>Age</b>                     | Mean (SD) | 61.2 (8.3)                              | 64.4 (8.9)                          | 60.9 (7.7)                           | <0.001         |
| <b>wCCI</b>                    | Mean (SD) | 1.4 (2.4)                               | 5.0 (3.3)                           | 1.6 (2.5)                            | <0.001         |
| <b>Income quintiles, n (%)</b> | Richest   | 3,422 (28.7)                            | 64 (28.2)                           | 937 (37.0)                           | <0.001         |
|                                | Rich      | 2,743 (23.0)                            | 42 (18.5)                           | 605 (23.9)                           |                |
|                                | Middle    | 2,120 (17.8)                            | 35 (15.4)                           | 404 (15.9)                           |                |
|                                | Poor      | 1,703 (14.3)                            | 47 (20.7)                           | 334 (13.2)                           |                |
|                                | Poorest   | 1,903 (16.0)                            | 39 (17.2)                           | 253 (10.0)                           |                |
|                                | Missing   | 32 (0.3)                                | 0 (0)                               | 2 (0.1)                              |                |
| <b>Education, n (%)</b>        | Tertiary  | 4,186 (35.1)                            | 82 (36.1)                           | 1074 (42.4)                          | <0.001         |
|                                | Secondary | 5,609 (47.0)                            | 97 (42.7)                           | 1150 (45.4)                          |                |
|                                | Primary   | 1,882 (15.8)                            | 45 (19.8)                           | 290 (11.4)                           |                |
|                                | Missing   | 246 (2.1)                               | 3 (1.3)                             | 21 (0.8)                             |                |

274 wCCI: Weighted Charlson Comorbidity Index. SD standard deviation

Figure 1

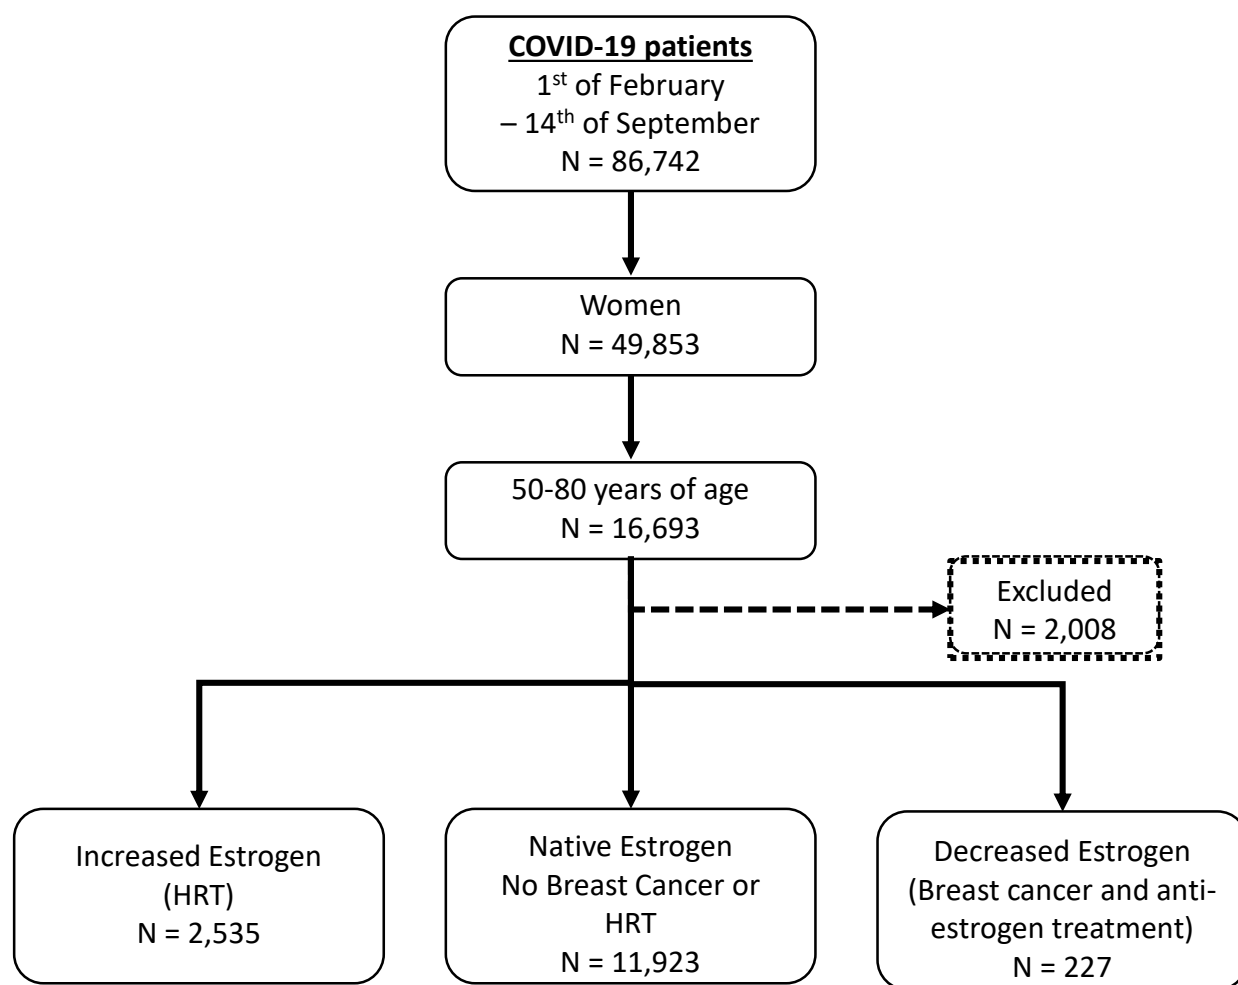

Figure 2

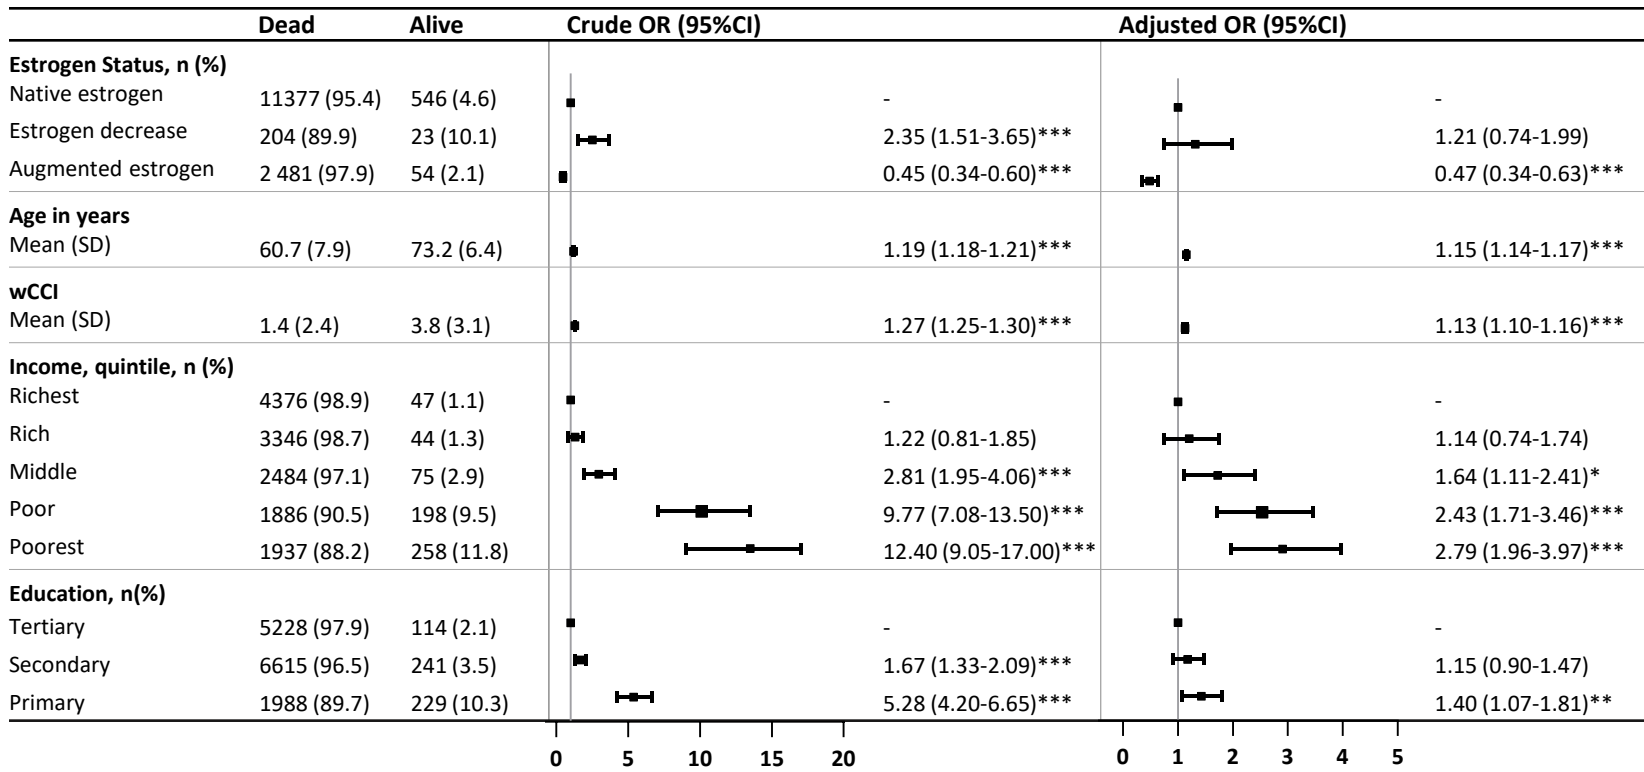

## STROBE Statement—checklist of items that should be included in reports of observational studies

|                              | Item No | Recommendation                                                                                                                                                                                                                                                                                                                                                                                                                                                                                                                                                                                                                                                                                   |
|------------------------------|---------|--------------------------------------------------------------------------------------------------------------------------------------------------------------------------------------------------------------------------------------------------------------------------------------------------------------------------------------------------------------------------------------------------------------------------------------------------------------------------------------------------------------------------------------------------------------------------------------------------------------------------------------------------------------------------------------------------|
| <b>Title and abstract</b>    | 1       | (a) Indicate the study's design with a commonly used term in the title or the abstract<br>(b) Provide in the abstract an informative and balanced summary of what was done and what was found                                                                                                                                                                                                                                                                                                                                                                                                                                                                                                    |
| <b>Introduction</b>          |         |                                                                                                                                                                                                                                                                                                                                                                                                                                                                                                                                                                                                                                                                                                  |
| Background/rationale         | 2       | Explain the scientific background and rationale for the investigation being reported                                                                                                                                                                                                                                                                                                                                                                                                                                                                                                                                                                                                             |
| Objectives                   | 3       | State specific objectives, including any prespecified hypotheses                                                                                                                                                                                                                                                                                                                                                                                                                                                                                                                                                                                                                                 |
| <b>Methods</b>               |         |                                                                                                                                                                                                                                                                                                                                                                                                                                                                                                                                                                                                                                                                                                  |
| Study design                 | 4       | Present key elements of study design early in the paper                                                                                                                                                                                                                                                                                                                                                                                                                                                                                                                                                                                                                                          |
| Setting                      | 5       | Describe the setting, locations, and relevant dates, including periods of recruitment, exposure, follow-up, and data collection                                                                                                                                                                                                                                                                                                                                                                                                                                                                                                                                                                  |
| Participants                 | 6       | (a) <i>Cohort study</i> —Give the eligibility criteria, and the sources and methods of selection of participants. Describe methods of follow-up<br><i>Case-control study</i> —Give the eligibility criteria, and the sources and methods of case ascertainment and control selection. Give the rationale for the choice of cases and controls<br><i>Cross-sectional study</i> —Give the eligibility criteria, and the sources and methods of selection of participants<br>(b) <i>Cohort study</i> —For matched studies, give matching criteria and number of exposed and unexposed<br><i>Case-control study</i> —For matched studies, give matching criteria and the number of controls per case |
| Variables                    | 7       | Clearly define all outcomes, exposures, predictors, potential confounders, and effect modifiers. Give diagnostic criteria, if applicable                                                                                                                                                                                                                                                                                                                                                                                                                                                                                                                                                         |
| Data sources/<br>measurement | 8*      | For each variable of interest, give sources of data and details of methods of assessment (measurement). Describe comparability of assessment methods if there is more than one group                                                                                                                                                                                                                                                                                                                                                                                                                                                                                                             |
| Bias                         | 9       | Describe any efforts to address potential sources of bias                                                                                                                                                                                                                                                                                                                                                                                                                                                                                                                                                                                                                                        |
| Study size                   | 10      | Explain how the study size was arrived at                                                                                                                                                                                                                                                                                                                                                                                                                                                                                                                                                                                                                                                        |
| Quantitative variables       | 11      | Explain how quantitative variables were handled in the analyses. If applicable, describe which groupings were chosen and why                                                                                                                                                                                                                                                                                                                                                                                                                                                                                                                                                                     |
| Statistical methods          | 12      | (a) Describe all statistical methods, including those used to control for confounding<br>(b) Describe any methods used to examine subgroups and interactions<br>(c) Explain how missing data were addressed<br>(d) <i>Cohort study</i> —If applicable, explain how loss to follow-up was addressed<br><i>Case-control study</i> —If applicable, explain how matching of cases and controls was addressed<br><i>Cross-sectional study</i> —If applicable, describe analytical methods taking account of sampling strategy<br>(e) Describe any sensitivity analyses                                                                                                                                |

Continued on next page

1  
2  
3  
4  
5  
6  
7  
8  
9  
10  
11  
12  
13  
14  
15  
16  
17  
18  
19  
20  
21  
22  
23  
24  
25  
26  
27  
28  
29  
30  
31  
32  
33  
34  
35  
36  
37  
38  
39  
40  
41  
42  
43  
44  
45  
46  
47  
48  
49  
50  
51  
52  
53  
54  
55  
56  
57  
58  
59  
60**Results**

|                  |     |                                                                                                                                                                                                                                                                                                                                                                                                               |
|------------------|-----|---------------------------------------------------------------------------------------------------------------------------------------------------------------------------------------------------------------------------------------------------------------------------------------------------------------------------------------------------------------------------------------------------------------|
| Participants     | 13* | (a) Report numbers of individuals at each stage of study—eg numbers potentially eligible, examined for eligibility, confirmed eligible, included in the study, completing follow-up, and analysed<br>(b) Give reasons for non-participation at each stage<br>(c) Consider use of a flow diagram                                                                                                               |
| Descriptive data | 14* | (a) Give characteristics of study participants (eg demographic, clinical, social) and information on exposures and potential confounders<br>(b) Indicate number of participants with missing data for each variable of interest<br>(c) <i>Cohort study</i> —Summarise follow-up time (eg, average and total amount)                                                                                           |
| Outcome data     | 15* | <i>Cohort study</i> —Report numbers of outcome events or summary measures over time<br><i>Case-control study</i> —Report numbers in each exposure category, or summary measures of exposure<br><i>Cross-sectional study</i> —Report numbers of outcome events or summary measures                                                                                                                             |
| Main results     | 16  | (a) Give unadjusted estimates and, if applicable, confounder-adjusted estimates and their precision (eg, 95% confidence interval). Make clear which confounders were adjusted for and why they were included<br>(b) Report category boundaries when continuous variables were categorized<br>(c) If relevant, consider translating estimates of relative risk into absolute risk for a meaningful time period |
| Other analyses   | 17  | Report other analyses done—eg analyses of subgroups and interactions, and sensitivity analyses                                                                                                                                                                                                                                                                                                                |

**Discussion**

|                  |    |                                                                                                                                                                            |
|------------------|----|----------------------------------------------------------------------------------------------------------------------------------------------------------------------------|
| Key results      | 18 | Summarise key results with reference to study objectives                                                                                                                   |
| Limitations      | 19 | Discuss limitations of the study, taking into account sources of potential bias or imprecision. Discuss both direction and magnitude of any potential bias                 |
| Interpretation   | 20 | Give a cautious overall interpretation of results considering objectives, limitations, multiplicity of analyses, results from similar studies, and other relevant evidence |
| Generalisability | 21 | Discuss the generalisability (external validity) of the study results                                                                                                      |

**Other information**

|         |    |                                                                                                                                                               |
|---------|----|---------------------------------------------------------------------------------------------------------------------------------------------------------------|
| Funding | 22 | Give the source of funding and the role of the funders for the present study and, if applicable, for the original study on which the present article is based |
|---------|----|---------------------------------------------------------------------------------------------------------------------------------------------------------------|

\*Give information separately for cases and controls in case-control studies and, if applicable, for exposed and unexposed groups in cohort and cross-sectional studies.

**Note:** An Explanation and Elaboration article discusses each checklist item and gives methodological background and published examples of transparent reporting. The STROBE checklist is best used in conjunction with this article (freely available on the Web sites of PLoS Medicine at <http://www.plosmedicine.org/>, Annals of Internal Medicine at <http://www.annals.org/>, and Epidemiology at <http://www.epidem.com/>). Information on the STROBE Initiative is available at [www.strobe-statement.org](http://www.strobe-statement.org).

# BMJ Open

## Association between pharmaceutical modulation of oestrogen in postmenopausal women in Sweden with death due to COVID-19 – a cohort study

|                                 |                                                                                                                                                                                                                                                                                                                                                                                                                                                                                                                                                                         |
|---------------------------------|-------------------------------------------------------------------------------------------------------------------------------------------------------------------------------------------------------------------------------------------------------------------------------------------------------------------------------------------------------------------------------------------------------------------------------------------------------------------------------------------------------------------------------------------------------------------------|
| Journal:                        | <i>BMJ Open</i>                                                                                                                                                                                                                                                                                                                                                                                                                                                                                                                                                         |
| Manuscript ID                   | bmjopen-2021-053032.R1                                                                                                                                                                                                                                                                                                                                                                                                                                                                                                                                                  |
| Article Type:                   | Original research                                                                                                                                                                                                                                                                                                                                                                                                                                                                                                                                                       |
| Date Submitted by the Author:   | 27-Oct-2021                                                                                                                                                                                                                                                                                                                                                                                                                                                                                                                                                             |
| Complete List of Authors:       | Sund, Malin; Umeå Universitet Medicinska fakulteten, Department of Surgical and Perioperative Sciences<br>Fonseca-Rodríguez, Osvaldo; Umeå Universitet Medicinska fakulteten, Department of Clinical Microbiology<br>Josefsson, Andreas; Umeå Universitet Medicinska fakulteten, Department of Surgical and Perioperative Sciences/ Urology; University of Gothenburg, Department of Urology<br>Welen, Karin; University of Gothenburg, Department of Urology<br>Fors Connolly, Anne-Marie; Umeå Universitet Medicinska fakulteten, Department of Clinical Microbiology |
| <b>Primary Subject Heading</b>: | Epidemiology                                                                                                                                                                                                                                                                                                                                                                                                                                                                                                                                                            |
| Secondary Subject Heading:      | Infectious diseases, Oncology                                                                                                                                                                                                                                                                                                                                                                                                                                                                                                                                           |
| Keywords:                       | COVID-19, Sex steroids & HRT < DIABETES & ENDOCRINOLOGY, EPIDEMIOLOGY, Epidemiology < INFECTIOUS DISEASES                                                                                                                                                                                                                                                                                                                                                                                                                                                               |
|                                 |                                                                                                                                                                                                                                                                                                                                                                                                                                                                                                                                                                         |

SCHOLARONE™  
Manuscripts





I, the Submitting Author has the right to grant and does grant on behalf of all authors of the Work (as defined in the below author licence), an exclusive licence and/or a non-exclusive licence for contributions from authors who are: i) UK Crown employees; ii) where BMJ has agreed a CC-BY licence shall apply, and/or iii) in accordance with the terms applicable for US Federal Government officers or employees acting as part of their official duties; on a worldwide, perpetual, irrevocable, royalty-free basis to BMJ Publishing Group Ltd ("BMJ") its licensees and where the relevant Journal is co-owned by BMJ to the co-owners of the Journal, to publish the Work in this journal and any other BMJ products and to exploit all rights, as set out in our [licence](#).

The Submitting Author accepts and understands that any supply made under these terms is made by BMJ to the Submitting Author unless you are acting as an employee on behalf of your employer or a postgraduate student of an affiliated institution which is paying any applicable article publishing charge ("APC") for Open Access articles. Where the Submitting Author wishes to make the Work available on an Open Access basis (and intends to pay the relevant APC), the terms of reuse of such Open Access shall be governed by a Creative Commons licence – details of these licences and which [Creative Commons](#) licence will apply to this Work are set out in our licence referred to above.

Other than as permitted in any relevant BMJ Author's Self Archiving Policies, I confirm this Work has not been accepted for publication elsewhere, is not being considered for publication elsewhere and does not duplicate material already published. I confirm all authors consent to publication of this Work and authorise the granting of this licence.

1  
2  
3 **1 Association between pharmaceutical modulation of oestrogen in postmenopausal**  
4  
5 **2 women in Sweden with death due to COVID-19 – a cohort study**  
6  
7  
8  
9

10 4 Malin Sund MD PhD<sup>1,2</sup>, Osvaldo Fonseca-Rodriguez DVM PhD<sup>3</sup>, Andreas Josefsson MD  
11  
12 5 PhD<sup>4-6</sup>, Karin Welen PhD<sup>6</sup>, Anne-Marie Fors Connolly MD PhD<sup>3\*</sup>  
13  
14  
15 6

16  
17 7 1. Department of Surgical and Perioperative Sciences/ Surgery, Umeå University, Umeå,  
18  
19 8 Sweden

20  
21 9 2. Department of Surgery, University of Helsinki and Helsinki University Hospital, Helsinki,  
22  
23 10 Finland

24  
25 11 3. Department of Clinical Microbiology, Umeå University, Umeå, Sweden

26  
27 12 4. Department of Surgical and Perioperative Sciences/ Urology, Umeå University, Umeå,  
28  
29 13 Sweden

30  
31 14 5. Wallenberg Center for Molecular Medicine, Umeå University, Umeå Sweden

32  
33 15 6. Department of Urology, Sahlgrenska Center for Cancer Research, Institute of Clinical  
34  
35 16 Sciences, Sahlgrenska Academy, University of Gothenburg, Gothenburg, Sweden  
36  
37  
38  
39

40  
41  
42 18 \* Corresponding author:

43  
44 19 Anne-Marie Fors Connolly

45  
46 20 Department of Clinical Microbiology

47  
48 21 Umeå University

49  
50 22 901 85 Umeå

51  
52 23 Sweden

53  
54 24 E-mail: [anne-marie.fors.connolly@umu.se](mailto:anne-marie.fors.connolly@umu.se)  
55  
56  
57  
58  
59  
60

1  
2  
3  
4  
5  
6  
7  
8  
9  
10  
11  
12  
13  
14  
15  
16  
17  
18  
19  
20  
21  
22  
23  
24  
25  
26  
27  
28  
29  
30  
31  
32  
33  
34  
35  
36  
37  
38  
39  
40  
41  
42  
43  
44  
45  
46  
47  
48  
49  
50  
51  
52  
53  
54  
55  
56  
57  
58  
59  
60

26 Number of words text: 1652

27 Number of words abstract: 297

For peer review only

1  
2  
3 **28 Abstract**  
4

5 29 Objective: Determine whether augmentation of oestrogen in post-menopausal women  
6  
7  
8 30 decreases the risk of death following COVID-19.  
9

10  
11 31  
12 32 Design: Nationwide study in Sweden based on registries from The Swedish Public Health  
13  
14 33 Agency; Statistics Sweden (socioeconomical variables) and the National Board of Health and  
15  
16 34 Welfare (Causes of death).  
17  
18

19 35  
20  
21 36 Participants: Postmenopausal women between 50 and 80 years of age with verified COVID-  
22  
23 37 19.  
24  
25

26 38  
27  
28 39 Interventions: Pharmaceutical modulation of oestrogen as defined by (1) women with breast  
29  
30 40 cancer receiving endocrine therapy (decreased systemic oestrogen levels); (2)  
31  
32 41 postmenopausal hormone therapy (HT; increased systemic oestrogen levels) and (3) a control  
33  
34 42 group (postmenopausal oestrogen levels). Adjustments were made for potential confounders  
35  
36 43 such as age, annual disposable income (richest group as the reference category), highest level  
37  
38 44 of education (primary, secondary and tertiary (reference)) and the weighted Charlson  
39  
40 45 Comorbidity Index (wCCI).  
41  
42  
43  
44  
45  
46

47 46  
47 47 Primary outcome measure: Death following COVID-19.  
48  
49

50 48  
51 49 Results: From a nationwide cohort consisting of 49,853 women diagnosed with COVID-19  
52  
53 50 between February 4 and September 14, 2020 in Sweden, we included 14,685 women in the  
54  
55 51 study with 11,923 (81%) in the control group, 227 (2%) women in group 1 and 2,535 (17%)  
56  
57 52 women in group 2. The unadjusted odds ratio (OR) for death following COVID-19 was 2.35  
58  
59  
60

1  
2  
3 53 (95% CI 1.51-3.65) for group 1 and 0.45 (0.34-0.6) for group 2. Only the adjusted OR for  
4  
5 54 death remained significant for group 2 with OR 0.47 (0.34-0.63). Absolute risk (AR) of death  
6  
7 55 was 4.6% for the control group vs 10.1% and 2.1%, for the decreased and increased  
8  
9  
10 56 oestrogen groups, respectively. The risk of death due to COVID-19 was significantly  
11  
12 57 associated with: age, annual income, and education.  
13  
14  
15 58

16  
17 59 Conclusions: Oestrogen supplementation in post-menopausal women is associated with a  
18  
19 60 decreased risk of dying from COVID-19 in this nationwide cohort study. These findings are  
20  
21 61 limited by the retrospective and non-randomized design. Further randomized intervention  
22  
23 62 trials are warranted.  
24  
25  
26  
27 63

#### 64 **Strengths and limitations of the study**

- 65 • This study is based on all diagnosed COVID-19 patients in Sweden between February  
66 1 and September 14, 2020
- 67 • Swedish registry data is well-validated and due to historical registry data and cross-  
68 linkage with the registries of Statistics Sweden, the confounding and/or effect-  
69 modifying effects of socioeconomic variables and comorbidities could be adjusted for
- 70 • The findings are limited by the retrospective and non-randomized design.
- 71 • Information regarding compliance to pharmaceutical modulation of oestrogen is  
72 missing
- 73 • Circulating oestrogen levels are not measured

## 74 **Introduction**

75 The coronavirus disease 2019 (COVID-19) pandemic has swept across the globe causing  
76 enormous strain on societies and health care systems. Although women are infected, they  
77 appear to be protected from poor outcomes when compared with men even after adjustment  
78 for confounding risk factors<sup>1 2</sup>. Similar epidemiological findings have also been described  
79 for SARS-CoV and MERS-CoV infections<sup>3 4 5</sup>. This implies biological differences between  
80 the sexes in terms of sensitivity to severe COVID-19, and oestrogen has been identified as a  
81 potential therapeutic candidate.

82  
83 The majority of breast cancer (BC) patients have oestrogen receptor (ER)-positive cancer<sup>6</sup>  
84 and are usually given adjuvant endocrine therapy after surgery in order to reduce the risk of  
85 cancer recurrences, leading to *reduced* systemic oestrogen levels. On the other hand, systemic  
86 oestrogen levels are *augmented* in women taking postmenopausal hormone therapy (HT) to  
87 relieve menopausal symptoms<sup>7</sup>. In a nationwide cohort, we used the opposing effects of  
88 endocrine therapy in BC patients and women taking postmenopausal HT in modulating  
89 systemic oestrogen levels as a model to test the hypothesis that increased oestrogen levels  
90 are protective towards COVID-19 death.

## 91 **Materials and methods**

### 92 *Patients and public involvement statement*

93 All data from the Swedish registries were pseudonymised and therefore patients were not  
94 involved in the study.

### 96 *Participants and sources of data*

97 The personal identification numbers (PINs) from all diagnosed COVID-19 individuals in  
98 Sweden (SmiNet) between the February 1 and September 14, 2020 were cross-linked with the  
99 LISA Register (Longitudinal integrated database for health insurance and labour market  
100 studies) administered by Statistics Sweden; and the following healthcare registers  
101 administered by the Swedish National Board of Health and Welfare: patient, cancer,  
102 prescribed pharmaceutical, and causes of death. Post-menopausal women 50-80 years of age  
103 were stratified into three groups as follows: Group 1, the *decreased oestrogen group*,  
104 included patients with BC as identified by the International Classification of Diseases (ICD)  
105 version 10 code C50, and the following treatments: tamoxifen or fulvestrant (anatomical  
106 therapeutic chemical (ATC): L02BA01, L02BA03) or an aromatase inhibitor (AI; ATC  
107 L02BG03, L02BG04, and L02BG06). Group 2, the *augmented oestrogen group*, included  
108 those patients treated with drugs classified as postmenopausal hormone therapy (ATC codes  
109 G03CA03, G03CA04, G03CC07, G03CX01, G03FA, and G03FB). All ATC codes for  
110 groups 1 and 2 were identified from the Prescribed Pharmaceutical Register with at least two  
111 consecutive withdrawals and at least one during the period extending from July 1, 2019 - to  
112 the latest date. Group 3, the *native oestrogen (control) group*, included patients with no BC  
113 diagnosis and no prescription of the above-mentioned pharmaceuticals at any time during  
114 2019 and 2020. Ethical approval was granted by the Swedish Ethical Review Authority.

115

1  
2  
3 116 *Outcome, confounders and effect modifiers*  
4

5 117 The outcome was death due to COVID-19, as identified by the ICD-10 code U07, as the main  
6  
7  
8 118 or contributing cause of death from the Cause of Death Register. Potential confounders and  
9  
10 119 effect modifiers were included in the model and consisted of the weighted Charlson  
11  
12 120 comorbidity index (wCCI)<sup>8</sup>, age at COVID-19 diagnosis, income (divided into quintiles with  
13  
14 121 the richest group as the reference) and education (primary, secondary and tertiary, which  
15  
16 122 served as the reference). The wCCI was calculated using the Patient and Cancer Registers, up  
17  
18  
19 123 to 2 months prior to the COVID-19 date in order not to include complications due to COVID-  
20  
21 124 19 as a comorbidity. If there was no information regarding diagnosis codes required for  
22  
23 125 wCCI scoring, the individual was assigned a wCCI of zero. Information regarding income  
24  
25 126 and education was retrieved from the LISA-register.  
26  
27  
28  
29

30

31 128 *Statistical methods*  
32

33 129 The distributions of continuous and categorical variables in the three groups were tested  
34  
35 130 using ANOVA and the  $\chi^2$  test, respectively. Each variable was then analysed with univariate  
36  
37 131 logistic regression models, followed by a multivariable regression model to compare the  
38  
39 132 control group with groups 1 and 2, respectively, and adjusting for confounders. Descriptive  
40  
41 133 analyses and logistic regression models were performed using R statistical software version  
42  
43 134 4.0.2, using the *finalfit* package 1.0.2.  
44  
45  
46  
47  
48  
49  
50  
51  
52  
53  
54  
55  
56  
57  
58  
59  
60



## 135 **Results**

### 136 *Participants*

137 During the study period a total of 49,853 women of all ages were diagnosed with COVID-19  
138 in Sweden, and a total of 14,685 women aged 50-80 years were included in our study (figure  
139 1). Characteristics of these groups are shown in table 1. Individuals with decreased oestrogen  
140 due to adjuvant endocrine therapy for BC (group 1) were older with a higher comorbidity  
141 index. A larger proportion of women in group 2 (increased levels of systemic oestrogen due  
142 to postmenopausal HT) had high income and a tertiary level of education (table 1).

143

### 144 *Oestrogen augmentation protects against death due to COVID-19*

145 Pharmaceutically decreasing systemic oestrogen levels increased the odds of dying due to  
146 COVID-19 (group 1: odds ratio [OR] 2.35, 95% confidence intervals [CI] 1.51 - 3.65), but  
147 following adjustment for confounders this association was no longer significant (figure 2).  
148 Interestingly, augmentation of systemic oestrogen levels decreased the odds of dying due to  
149 COVID-19, with OR 0.45 (95% CI 0.34 - 0.6), and this result remained significant even after  
150 adjustment for confounders (OR 0.47, 95% CI 0.34 - 0.63). The absolute risk (AR) of dying  
151 was 4.6% for the control group vs. 10.1% and 2.1% for the groups with decreased and  
152 increased oestrogen, respectively.

153

154 As expected, higher age and wCCI increased the odds of dying due to COVID-19. For every  
155 year increase in age the odds of dying were 1.15 (95% CI 1.14-1.17), and for every increase  
156 in wCCI the odds of dying were 1.13 (95% CI 1.10-1.16) (figure 2). Furthermore, low  
157 income and having only primary education were also factors that increased the odds of dying  
158 due to COVID-19 (figure 2).

## 159 Discussion

### 160 Principal findings

161 The major finding of this nationwide registry-based study is that pharmaceutical  
162 augmentation of oestrogen levels is associated with decreased odds of death due to COVID-  
163 19 in postmenopausal women.

164

### 165 Comparison with related studies

166 There are several possible biological explanations for the lower risk experienced by women.  
167 These include mechanisms directly involved in viral internalization and reproduction, where  
168 oestrogen has been shown to decrease expression of vital proteins such as ACE2 and  
169 TMPRSS2<sup>9-11</sup>, inherent sex-linked differences in the immune system, and direct oestrogen  
170 effects<sup>12</sup>. As an example, Kalidhindi et al have studied the effect of testosterone and  
171 oestrogen on ACE2 expression, a key cell entry for SARS-CoV-2 virus, using *in vitro*  
172 experiments on isolated human airway smooth muscle cells of male and female origin<sup>13</sup>. Most  
173 interestingly, they show that cells exposed to oestrogen and testosterone behave differently,  
174 as testosterone significantly upregulates ACE2 expression in cells from both sexes, whereas  
175 oestrogen downregulates ACE2<sup>13</sup>. ACE2 expression and differences in its expression in  
176 relation to sex could also be linked to the higher mortality in relation to hypertension, venous  
177 thromboembolism and SARS-CoV-2 infection between men and women<sup>14</sup>. The observed  
178 oestrogen induced reduction of ACE2 expression might however not necessarily translate  
179 into a reduction of ACE2 protein at the cell surface *in vivo* in all cell types. Our findings are  
180 also supported by *in vitro* studies where 17 $\beta$ -oestradiol treatment reduced SARS-CoV-2 viral  
181 load<sup>9</sup>. Previous experimental studies in mice on SARS-CoV have, moreover, shown that  
182 female mice are less susceptible to infection and that this protection was lost upon  
183 oophorectomy, thus indicating a direct protective role of oestrogen signalling<sup>15</sup>. Furthermore,

1  
2  
3 184 Barh et al., using a multiomics approach on SARS-CoV-2-infected host interactome,  
4  
5 185 proteome, transcriptome, and bibliome datasets, demonstrated that oestrogen modulation  
6  
7 186 could be a potential therapeutic option in COVID-19 <sup>16</sup>. Our results are in line with those by  
8  
9  
10 187 Seeland et al using real world evidence from multiple institutions and the TriNetX platform.  
11  
12 188 They found by using propensity score matched analysis of data for women aged 50 and above  
13  
14 189 with COVID-19 (n=439), that there was a survival benefit for oestradiol hormone-users  
15  
16 190 versus non-users (OR 0.33 (95%CI 0.18-0.62)). Although based on a large real-world dataset  
17  
18 191 the risk of selection bias was more difficult to discern since the cohort was neither  
19  
20 192 population-based nor adjusted for central confounders although likely mitigated by the  
21  
22 193 propensity score matched analysis <sup>17</sup>. In our study the effect of increased systemic oestrogen  
23  
24 194 levels on reducing the risk of COVID-19 death remained significant after adjusting for  
25  
26 195 education level and income, both factors known to influence COVID-19 outcome <sup>18</sup>, further  
27  
28 196 supporting the protective role of oestrogen in women.  
29  
30  
31 197 The hypothetical inverse, a worsening effect of reduced systemic oestrogen levels in women  
32  
33 198 with a previous BC receiving adjuvant endocrine therapy, was initially significant but not  
34  
35 199 after adjusting for confounders. This population differs from the control group in that they all  
36  
37 200 have been diagnosed with BC and it has been shown that patients, both men and women, with  
38  
39 201 any cancer are harder hit by COVID-19 <sup>19</sup>. However, in a previous study BC patients were  
40  
41 202 shown to be healthier compared with the background population in terms of ischemic cardiac  
42  
43 203 disease and CCI <sup>20</sup>, and the wCCI adjustments may therefore overcompensate for this cancer-  
44  
45 204 related vulnerability. Although not significant, a trend towards worse outcome remained and  
46  
47 205 thus a larger population of BC patients on endocrine therapy is likely needed to verify the  
48  
49 206 finding. Thus, this study cannot exclude an increased risk of death from COVID-19 if  
50  
51 207 systemic oestrogen levels are pharmaceutically decreased.  
52  
53  
54  
55  
56  
57  
58  
59  
60

1  
2  
3 209 Strengths and limitations  
4

5 210 The strengths of this study are that this is a nationwide cohort in a country with high COVID-  
6  
7 211 19 incidence using well validated registry data. A weakness is that the level of oestrogen  
8  
9 212 modulation cannot be exactly measured in each individual, and that the number of BC  
10  
11 213 women on anti-oestrogen medication ended up being too small to show significance although  
12  
13 214 there was a clear trend. The postmenopausal HT group, however, proved large enough to  
14  
15 215 show the clear protective effect. A further limitation is that confounding factors such as body  
16  
17 216 mass index (BMI), nutrition and smoking habits are not available in the nationwide registry  
18  
19 217 data.  
20  
21  
22  
23

24 218

25  
26 219 Implications and conclusion  
27

28 220 This study shows an association between oestrogen levels and COVID-19 death.  
29  
30 221 Consequently, drugs increasing oestrogen levels may have a role in therapeutic efforts to  
31  
32 222 alleviate COVID-19 severity in post-menopausal women and could be studied in randomized  
33  
34 223 control trials.  
35  
36  
37  
38  
39  
40  
41  
42  
43  
44  
45  
46  
47  
48  
49  
50  
51  
52  
53  
54  
55  
56  
57  
58  
59  
60

1  
2  
3 224 **Acknowledgments:**  
4

5 225 We would like to thank Wolfgang Lohr for data management and Dr- Chloé Jacquet for  
6  
7 226 helping us design figure 2.  
8  
9

10 227

11  
12 228 **Funding:**  
13

14 229 This study was funded by:

15  
16 230 AMFC: Central ALF-funding, Region Västerbotten (RV-836351), Base unit ALF-funding  
17  
18 231 (RV-939769); Strategic Funding during 2020 from the Department of Clinical Microbiology,  
19  
20 232 Umeå University; Stroke Research in Northern Sweden; and Molecular Infection Medicine  
21  
22 233 Sweden (MIMS).  
23  
24

25 234 AJ: the Knut and Alice Wallenberg Foundation  
26  
27  
28 235

29  
30 236 **Contributors**  
31

32 237 MS and KW conceptualized the study. MS and AMFC designed the study, with input from  
33  
34 238 KW, AJ and OFR. OFR and AMFC prepared the study data. OFR performed the statistical  
35  
36 239 analysis. MS, KW, AJ, OFR and AMFC contributed to interpretation of the results. MS wrote  
37  
38 240 the first draft of the manuscript. MS, KW, AJ, OFR and AMFC contributed to critical  
39  
40 241 revision of the manuscript. MS, KW, AJ, OFR and AMFC approved the final manuscript.  
41  
42 242 AMFC is the guarantor of this study. The corresponding author attests that all authors meet  
43  
44 243 the criteria for authorship and that all have been included.  
45  
46  
47  
48

49 244

50  
51 245 **Competing interests**  
52

53 246 All authors have completed the ICMJE uniform disclosure form at  
54  
55 247 [www.icmje.org/coi\\_disclosure.pdf](http://www.icmje.org/coi_disclosure.pdf) and declare: no support from any organisation for the  
56  
57 248 submitted work, no financial relationships with any organisations that might have an interest  
58  
59  
60

1  
2  
3 249 in the submitted work in the previous three years, and no other relationships or activities that  
4  
5 250 could appear to have influenced the submitted work.  
6  
7

8 251

9  
10 252 **Ethical approval**

11  
12 253 Ethical approval was obtained by the Swedish Ethical Review Authority (number 2020-  
13  
14 254 02150)  
15  
16

17 255

18  
19 256 **Data sharing**

20  
21 257 The study protocol (R script) is available upon request. The study used secondary registry  
22  
23 258 data that are regulated by the Public Access to Information and Secrecy Act (2009:400) and  
24  
25 259 are protected by strict confidentiality. For the purpose of research though, after formal  
26  
27 260 application to access personal data the responsible authority can grant access to data, though  
28  
29 261 this is contingent on vetting by the Ethical Review Authority of Sweden, according to the Act  
30  
31 262 (2003:460) concerning the Ethical Review of Research Involving Humans. This means that  
32  
33 263 the aggregated registry data cannot be shared.  
34  
35  
36  
37  
38  
39  
40  
41  
42  
43  
44  
45  
46  
47  
48  
49  
50  
51  
52  
53  
54  
55  
56  
57  
58  
59  
60

265

266 **References**

- 267 1. Williamson EJ, Walker AJ, Bhaskaran K, et al. Factors associated with COVID-19-related death  
268 using OpenSAFELY. *Nature* 2020;584(7821):430-36. doi: 10.1038/s41586-020-2521-4
- 269 2. Abate BB, Kassie AM, Kassaw MW, et al. Sex difference in coronavirus disease (COVID-19): a  
270 systematic review and meta-analysis. *BMJ Open* 2020;10(10):e040129. doi:  
271 10.1136/bmjopen-2020-040129 [published Online First: 2020/10/09]
- 272 3. Alghamdi IG, Hussain, II, Almalki SS, et al. The pattern of Middle East respiratory syndrome  
273 coronavirus in Saudi Arabia: a descriptive epidemiological analysis of data from the Saudi  
274 Ministry of Health. *Int J Gen Med* 2014;7:417-23. doi: 10.2147/IJGM.S67061 [published  
275 Online First: 2014/09/05]
- 276 4. Leong HN, Earnest A, Lim HH, et al. SARS in Singapore--predictors of disease severity. *Ann Acad*  
277 *Med Singap* 2006;35(5):326-31. [published Online First: 2006/07/11]
- 278 5. Karlberg J, Chong DS, Lai WY. Do men have a higher case fatality rate of severe acute respiratory  
279 syndrome than women do? *Am J Epidemiol* 2004;159(3):229-31. doi: 10.1093/aje/kwh056  
280 [published Online First: 2004/01/27]
- 281 6. Sung H, Ferlay J, Siegel RL, et al. Global cancer statistics 2020: GLOBOCAN estimates of incidence  
282 and mortality worldwide for 36 cancers in 185 countries. *CA Cancer J Clin* 2021 doi:  
283 10.3322/caac.21660
- 284 7. Delgado BJ, Lopez-Ojeda W. Estrogen. StatPearls. Treasure Island (FL)2021.
- 285 8. Ludvigsson JF, Appelros P, Askling J, et al. Adaptation of the Charlson Comorbidity Index for  
286 Register-Based Research in Sweden. *Clin Epidemiol* 2021;13:21-41. doi:  
287 10.2147/CLEP.S282475
- 288 9. Lemes RMR, Costa AJ, Bartolomeo CS, et al. 17beta-estradiol reduces SARS-CoV-2 infection in  
289 vitro. *Physiol Rep* 2021;9(2):e14707. doi: 10.14814/phy2.14707

- 1  
2  
3 290 10. Stelzig KE, Canepa-Escaro F, Schiliro M, et al. Estrogen regulates the expression of SARS-CoV-2  
4  
5 291 receptor ACE2 in differentiated airway epithelial cells. *Am J Physiol Lung Cell Mol Physiol*  
6  
7 292 2020;318(6):L1280-L81. doi: 10.1152/ajplung.00153.2020  
8  
9  
10 293 11. Young MJ, Clyne CD, Chapman KE. Endocrine aspects of ACE2 regulation: RAAS, steroid  
11  
12 294 hormones and SARS-CoV-2. *J Endocrinol* 2020;247(2):R45-R62. doi: 10.1530/JOE-20-0260  
13  
14 295 [published Online First: 2020/09/24]  
15  
16 296 12. Klein SL, Flanagan KL. Sex differences in immune responses. *Nat Rev Immunol* 2016;16(10):626-  
17  
18 297 38. doi: 10.1038/nri.2016.90  
19  
20 298 13. Kalidhindi RSR, Borkar NA, Ambhore NS, et al. Sex steroids skew ACE2 expression in human  
21  
22 299 airway: a contributing factor to sex differences in COVID-19? *Am J Physiol Lung Cell Mol*  
23  
24 300 *Physiol* 2020;319(5):L843-L47. doi: 10.1152/ajplung.00391.2020 [published Online First:  
25  
26 301 2020/10/01]  
27  
28  
29 302 14. La Vignera S, Cannarella R, Condorelli RA, et al. Sex-Specific SARS-CoV-2 Mortality: Among  
30  
31 303 Hormone-Modulated ACE2 Expression, Risk of Venous Thromboembolism and  
32  
33 304 Hypovitaminosis D. *Int J Mol Sci* 2020;21(8) doi: 10.3390/ijms21082948 [published Online  
34  
35 305 First: 2020/04/26]  
36  
37  
38 306 15. Channappanavar R, Fett C, Mack M, et al. Sex-Based Differences in Susceptibility to Severe Acute  
39  
40 307 Respiratory Syndrome Coronavirus Infection. *J Immunol* 2017;198(10):4046-53. doi:  
41  
42 308 10.4049/jimmunol.1601896 [published Online First: 2017/04/05]  
43  
44  
45 309 16. Barh D, Tiwari S, Weener ME, et al. Multi-omics-based identification of SARS-CoV-2 infection  
46  
47 310 biology and candidate drugs against COVID-19. *Comput Biol Med* 2020;126:104051. doi:  
48  
49 311 10.1016/j.combiomed.2020.104051  
50  
51  
52 312 17. Seeland U, Coluzzi F, Simmaco M, et al. Evidence for treatment with estradiol for women with  
53  
54 313 SARS-CoV-2 infection. *BMC Med* 2020;18(1):369. doi: 10.1186/s12916-020-01851-z  
55  
56  
57  
58  
59  
60



- 1  
2  
3 314 18. Drefahl S, Wallace M, Mussino E, et al. A population-based cohort study of socio-demographic  
4  
5 315 risk factors for COVID-19 deaths in Sweden. *Nat Commun* 2020;11(1):5097. doi:  
6  
7 316 10.1038/s41467-020-18926-3  
8  
9  
10 317 19. Zhang H, Han H, He T, et al. Clinical Characteristics and Outcomes of COVID-19-Infected Cancer  
11  
12 318 Patients: A Systematic Review and Meta-Analysis. *J Natl Cancer Inst* 2020 doi:  
13  
14 319 10.1093/jnci/djaa168  
15  
16 320 20. Wennstig AK, Wadsten C, Garmo H, et al. Long-term risk of ischemic heart disease after adjuvant  
17  
18 321 radiotherapy in breast cancer: results from a large population-based cohort. *Breast Cancer*  
19  
20 322 *Res* 2020;22(1):10. doi: 10.1186/s13058-020-1249-2  
21  
22

23 323  
24  
25  
26  
27  
28  
29  
30  
31  
32  
33  
34  
35  
36  
37  
38  
39  
40  
41  
42  
43  
44  
45  
46  
47  
48  
49  
50  
51  
52  
53  
54  
55  
56  
57  
58  
59  
60

1  
2  
3 324 **Figure legends**  
4

5 325 Figure 1: Flow chart of the study  
6  
7

8 326

9  
10 327 Figure 2: Oestrogen augmentation is associated with decreased odds of dying due to COVID-

11  
12 328 19. Crude and adjusted logistic regression models. Statistical significance: \* $p < 0.05$ , \*\* $p <$

13  
14 329  $0.01$ , \*\*\* $p < 0.001$ ). OR, odds ratio; CI, confidence intervals; wCCI, weighted Charlson

15  
16  
17 330 Comorbidity Index.  
18  
19  
20  
21  
22  
23  
24  
25  
26  
27  
28  
29  
30  
31  
32  
33  
34  
35  
36  
37  
38  
39  
40  
41  
42  
43  
44  
45  
46  
47  
48  
49  
50  
51  
52  
53  
54  
55  
56  
57  
58  
59  
60

For peer review only

331 **Table 1.** Characteristics of the study population

| Variable                       |           | Native oestrogen (control group) | Decreased oestrogen (group 1) | Augmented oestrogen (group 2) | p-value |
|--------------------------------|-----------|----------------------------------|-------------------------------|-------------------------------|---------|
| <b>Total N (%)</b>             |           | 11923 (81.2)                     | 227 (1.5)                     | 2535 (17.3)                   |         |
| <b>Deaths</b>                  | No        | 11377 (95.4)                     | 204 (89.9)                    | 2481 (97.9)                   | <0.001  |
|                                | Yes       | 546 (4.6)                        | 23 (10.1)                     | 54 (2.1)                      |         |
| <b>Age</b>                     | Mean (SD) | 61.2 (8.3)                       | 64.4 (8.9)                    | 60.9 (7.7)                    | <0.001  |
| <b>wCCI</b>                    | Mean (SD) | 1.4 (2.4)                        | 5.0 (3.3)                     | 1.6 (2.5)                     | <0.001  |
| <b>Income quintiles, n (%)</b> | Richest   | 3422 (28.7)                      | 64 (28.2)                     | 937 (37.0)                    | <0.001  |
|                                | Rich      | 2743 (23.0)                      | 42 (18.5)                     | 605 (23.9)                    |         |
|                                | Middle    | 2120 (17.8)                      | 35 (15.4)                     | 404 (15.9)                    |         |
|                                | Poor      | 1703 (14.3)                      | 47 (20.7)                     | 334 (13.2)                    |         |
|                                | Poorest   | 1903 (16.0)                      | 39 (17.2)                     | 253 (10.0)                    |         |
|                                | Missing   | 32 (0.3)                         | 0 (0)                         | 2 (0.1)                       |         |
| <b>Education, n (%)</b>        | Tertiary  | 4186 (35.1)                      | 82 (36.1)                     | 1074 (42.4)                   | <0.001  |
|                                | Secondary | 5609 (47.0)                      | 97 (42.7)                     | 1150 (45.4)                   |         |
|                                | Primary   | 1882 (15.8)                      | 45 (19.8)                     | 290 (11.4)                    |         |
|                                | Missing   | 246 (2.1)                        | 3 (1.3)                       | 21 (0.8)                      |         |

332 wCCI: Weighted Charlson Comorbidity Index. SD standard deviation

Figure 1

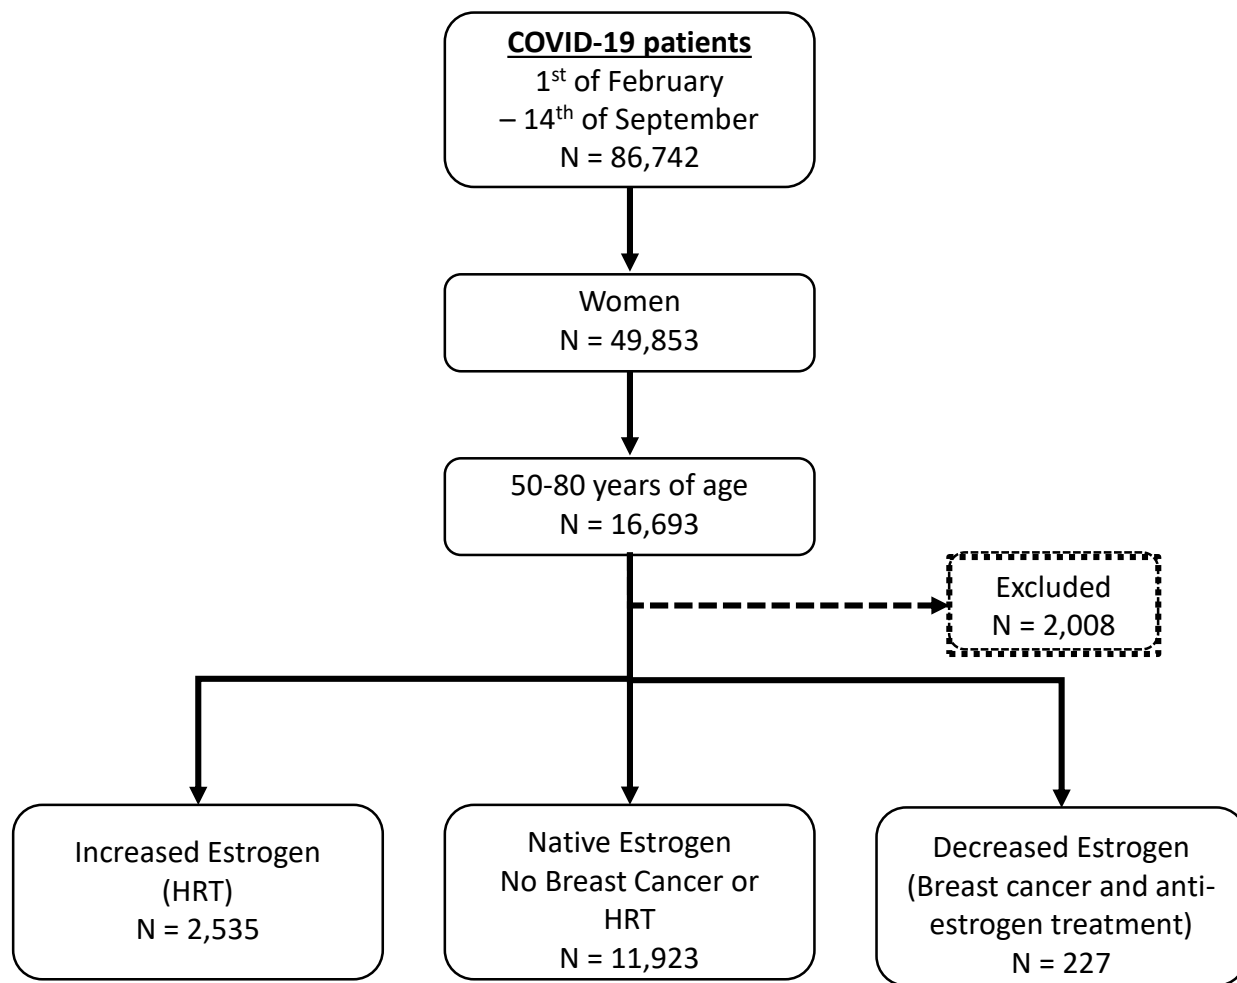

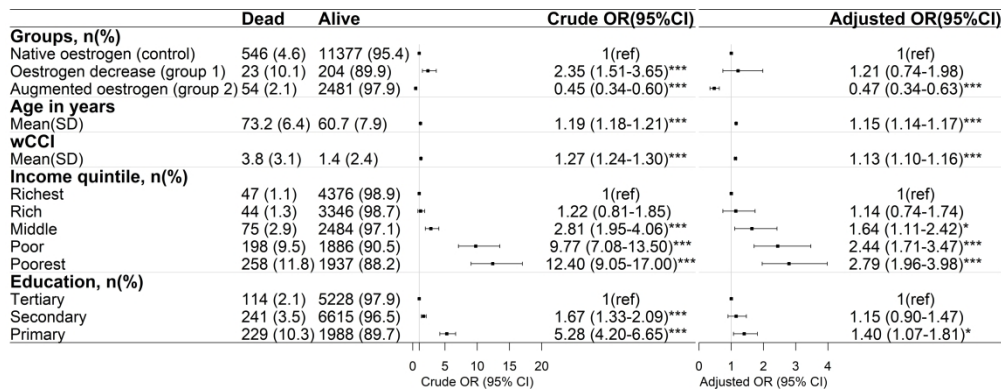

Figure 2

393x152mm (300 x 300 DPI)

STROBE Statement—Checklist of items that should be included in reports of *cohort studies*

|                              | Item No | Recommendation                                                                                                                                                                                                                                                                                                                                                                                                                                                |
|------------------------------|---------|---------------------------------------------------------------------------------------------------------------------------------------------------------------------------------------------------------------------------------------------------------------------------------------------------------------------------------------------------------------------------------------------------------------------------------------------------------------|
| <b>Title and abstract</b>    | 1       | (a) Indicate the study's design with a commonly used term in the title or the abstract.<br><i>"Association between pharmaceutical modulation of oestrogen in postmenopausal women in Sweden with death due to COVID-19 – a cohort study". Page 1, line 1-2</i><br>(b) Provide in the abstract an informative and balanced summary of what was done and what was found. <i>Page 3-4, line 28-62</i>                                                            |
| <b>Introduction</b>          |         |                                                                                                                                                                                                                                                                                                                                                                                                                                                               |
| Background/rationale         | 2       | Explain the scientific background and rationale for the investigation being reported. <i>Page 5, lines 75-90.</i>                                                                                                                                                                                                                                                                                                                                             |
| Objectives                   | 3       | State specific objectives, including any prespecified hypotheses. <i>Page 5, lines 87-90</i>                                                                                                                                                                                                                                                                                                                                                                  |
| <b>Methods</b>               |         |                                                                                                                                                                                                                                                                                                                                                                                                                                                               |
| Study design                 | 4       | Present key elements of study design early in the paper. <i>Page 6-7, lines 91-134</i>                                                                                                                                                                                                                                                                                                                                                                        |
| Setting                      | 5       | Describe the setting, locations, and relevant dates, including periods of recruitment, exposure, follow-up, and data collection. <i>Page 6, lines 96-114</i>                                                                                                                                                                                                                                                                                                  |
| Participants                 | 6       | (a) Give the eligibility criteria, and the sources and methods of selection of participants. Describe methods of follow-up. <i>Page 6, lines 96-114</i><br>(b) For matched studies, give matching criteria and number of exposed and unexposed. <i>Not applicable.</i>                                                                                                                                                                                        |
| Variables                    | 7       | Clearly define all outcomes, exposures, predictors, potential confounders, and effect modifiers. Give diagnostic criteria, if applicable. <i>Page 7, lines 116-126</i>                                                                                                                                                                                                                                                                                        |
| Data sources/<br>measurement | 8*      | For each variable of interest, give sources of data and details of methods of assessment (measurement). Describe comparability of assessment methods if there is more than one group. <i>Page 6-7, lines 91-134</i>                                                                                                                                                                                                                                           |
| Bias                         | 9       | Describe any efforts to address potential sources of bias. <i>Not applicable.</i>                                                                                                                                                                                                                                                                                                                                                                             |
| Study size                   | 10      | Explain how the study size was arrived at. <i>Page 6-7, lines 91-134</i>                                                                                                                                                                                                                                                                                                                                                                                      |
| Quantitative variables       | 11      | Explain how quantitative variables were handled in the analyses. If applicable, describe which groupings were chosen and why. <i>Page 6-7, lines 91-134</i>                                                                                                                                                                                                                                                                                                   |
| Statistical methods          | 12      | (a) Describe all statistical methods, including those used to control for confounding. <i>Page 7, lines 128-134</i><br>(b) Describe any methods used to examine subgroups and interactions. <i>Page 6-7, lines 91-134</i><br>(c) Explain how missing data were addressed. <i>Case only method.</i><br>(d) If applicable, explain how loss to follow-up was addressed. <i>Not applicable.</i><br>(e) Describe any sensitivity analyses. <i>Not applicable.</i> |
| <b>Results</b>               |         |                                                                                                                                                                                                                                                                                                                                                                                                                                                               |
| Participants                 | 13*     | (a) Report numbers of individuals at each stage of study—eg numbers potentially eligible, examined for eligibility, confirmed eligible, included in the study, completing follow-up, and analysed. <i>Page 8, lines 135-142</i><br>(b) Give reasons for non-participation at each stage. <i>Not applicable.</i><br>(c) Consider use of a flow diagram. <i>Figure 1.</i>                                                                                       |
| Descriptive data             | 14*     | (a) Give characteristics of study participants (eg demographic, clinical, social) and information on exposures and potential confounders. <i>Page 8, lines 135-142, Table 1</i>                                                                                                                                                                                                                                                                               |

1  
2  
3  
4  
5  
6  
7  
8  
9  
10  
11  
12  
13  
14  
15  
16  
17  
18  
19  
20  
21  
22  
23  
24  
25  
26  
27  
28  
29  
30  
31  
32  
33  
34  
35  
36  
37  
38  
39  
40  
41  
42  
43  
44  
45  
46  
47  
48  
49  
50  
51  
52  
53  
54  
55  
56  
57  
58  
59  
60

(b) Indicate number of participants with missing data for each variable of interest.

*Table 1.*

(c) Summarise follow-up time (eg, average and total amount). *Not applicable.*

|                          |     |                                                                                                                                                                                                                                                                                                                                                                                                                                                                                                               |
|--------------------------|-----|---------------------------------------------------------------------------------------------------------------------------------------------------------------------------------------------------------------------------------------------------------------------------------------------------------------------------------------------------------------------------------------------------------------------------------------------------------------------------------------------------------------|
| Outcome data             | 15* | Report numbers of outcome events or summary measures over time. <i>Page 8, lines 144-158.</i>                                                                                                                                                                                                                                                                                                                                                                                                                 |
| Main results             | 16  | (a) Give unadjusted estimates and, if applicable, confounder-adjusted estimates and their precision (eg, 95% confidence interval). Make clear which confounders were adjusted for and why they were included. <i>Page 8, lines 144-158. Figure 2.</i><br>(b) Report category boundaries when continuous variables were categorized. <i>Not applicable.</i><br>(c) If relevant, consider translating estimates of relative risk into absolute risk for a meaningful time period. <i>Page 8, lines 150-152.</i> |
| Other analyses           | 17  | Report other analyses done—eg analyses of subgroups and interactions, and sensitivity analyses. <i>Page 8, lines 154-158.</i>                                                                                                                                                                                                                                                                                                                                                                                 |
| <b>Discussion</b>        |     |                                                                                                                                                                                                                                                                                                                                                                                                                                                                                                               |
| Key results              | 18  | Summarise key results with reference to study objectives. <i>Page 9, lines 160-163.</i>                                                                                                                                                                                                                                                                                                                                                                                                                       |
| Limitations              | 19  | Discuss limitations of the study, taking into account sources of potential bias or imprecision. Discuss both direction and magnitude of any potential bias. <i>Page 11, lines 209-217.</i>                                                                                                                                                                                                                                                                                                                    |
| Interpretation           | 20  | Give a cautious overall interpretation of results considering objectives, limitations, multiplicity of analyses, results from similar studies, and other relevant evidence. <i>Page 11, lines 219-223.</i>                                                                                                                                                                                                                                                                                                    |
| Generalisability         | 21  | Discuss the generalisability (external validity) of the study results. <i>Page 9-10, lines 165-207</i>                                                                                                                                                                                                                                                                                                                                                                                                        |
| <b>Other information</b> |     |                                                                                                                                                                                                                                                                                                                                                                                                                                                                                                               |
| Funding                  | 22  | Give the source of funding and the role of the funders for the present study and, if applicable, for the original study on which the present article is based. <i>Page 12, lines 228-234.</i>                                                                                                                                                                                                                                                                                                                 |

\*Give information separately for exposed and unexposed groups.

**Note:** An Explanation and Elaboration article discusses each checklist item and gives methodological background and published examples of transparent reporting. The STROBE checklist is best used in conjunction with this article (freely available on the Web sites of PLoS Medicine at <http://www.plosmedicine.org/>, Annals of Internal Medicine at <http://www.annals.org/>, and Epidemiology at <http://www.epidem.com/>). Information on the STROBE Initiative is available at <http://www.strobe-statement.org>.

# BMJ Open

## Association between pharmaceutical modulation of oestrogen in postmenopausal women in Sweden with death due to COVID-19 – a cohort study

|                                 |                                                                                                                                                                                                                                                                                                                                                                                                                                                                                                                                                                         |
|---------------------------------|-------------------------------------------------------------------------------------------------------------------------------------------------------------------------------------------------------------------------------------------------------------------------------------------------------------------------------------------------------------------------------------------------------------------------------------------------------------------------------------------------------------------------------------------------------------------------|
| Journal:                        | <i>BMJ Open</i>                                                                                                                                                                                                                                                                                                                                                                                                                                                                                                                                                         |
| Manuscript ID                   | bmjopen-2021-053032.R2                                                                                                                                                                                                                                                                                                                                                                                                                                                                                                                                                  |
| Article Type:                   | Original research                                                                                                                                                                                                                                                                                                                                                                                                                                                                                                                                                       |
| Date Submitted by the Author:   | 18-Nov-2021                                                                                                                                                                                                                                                                                                                                                                                                                                                                                                                                                             |
| Complete List of Authors:       | Sund, Malin; Umeå Universitet Medicinska fakulteten, Department of Surgical and Perioperative Sciences<br>Fonseca-Rodríguez, Osvaldo; Umeå Universitet Medicinska fakulteten, Department of Clinical Microbiology<br>Josefsson, Andreas; Umeå Universitet Medicinska fakulteten, Department of Surgical and Perioperative Sciences/ Urology; University of Gothenburg, Department of Urology<br>Welen, Karin; University of Gothenburg, Department of Urology<br>Fors Connolly, Anne-Marie; Umeå Universitet Medicinska fakulteten, Department of Clinical Microbiology |
| <b>Primary Subject Heading</b>: | Epidemiology                                                                                                                                                                                                                                                                                                                                                                                                                                                                                                                                                            |
| Secondary Subject Heading:      | Infectious diseases, Oncology                                                                                                                                                                                                                                                                                                                                                                                                                                                                                                                                           |
| Keywords:                       | COVID-19, Sex steroids & HRT < DIABETES & ENDOCRINOLOGY, EPIDEMIOLOGY, Epidemiology < INFECTIOUS DISEASES                                                                                                                                                                                                                                                                                                                                                                                                                                                               |
|                                 |                                                                                                                                                                                                                                                                                                                                                                                                                                                                                                                                                                         |

SCHOLARONE™  
Manuscripts





I, the Submitting Author has the right to grant and does grant on behalf of all authors of the Work (as defined in the below author licence), an exclusive licence and/or a non-exclusive licence for contributions from authors who are: i) UK Crown employees; ii) where BMJ has agreed a CC-BY licence shall apply, and/or iii) in accordance with the terms applicable for US Federal Government officers or employees acting as part of their official duties; on a worldwide, perpetual, irrevocable, royalty-free basis to BMJ Publishing Group Ltd ("BMJ") its licensees and where the relevant Journal is co-owned by BMJ to the co-owners of the Journal, to publish the Work in this journal and any other BMJ products and to exploit all rights, as set out in our [licence](#).

The Submitting Author accepts and understands that any supply made under these terms is made by BMJ to the Submitting Author unless you are acting as an employee on behalf of your employer or a postgraduate student of an affiliated institution which is paying any applicable article publishing charge ("APC") for Open Access articles. Where the Submitting Author wishes to make the Work available on an Open Access basis (and intends to pay the relevant APC), the terms of reuse of such Open Access shall be governed by a Creative Commons licence – details of these licences and which [Creative Commons](#) licence will apply to this Work are set out in our licence referred to above.

Other than as permitted in any relevant BMJ Author's Self Archiving Policies, I confirm this Work has not been accepted for publication elsewhere, is not being considered for publication elsewhere and does not duplicate material already published. I confirm all authors consent to publication of this Work and authorise the granting of this licence.

1  
2  
3 **1 Association between pharmaceutical modulation of oestrogen in postmenopausal**  
4  
5 **2 women in Sweden with death due to COVID-19 – a cohort study**  
6  
7  
8  
9

10 4 Malin Sund MD PhD<sup>1,2</sup>, Osvaldo Fonseca-Rodriguez DVM PhD<sup>3</sup>, Andreas Josefsson MD  
11  
12 5 PhD<sup>4-6</sup>, Karin Welen PhD<sup>6</sup>, Anne-Marie Fors Connolly MD PhD<sup>3\*</sup>  
13  
14  
15  
16

17 7 1. Department of Surgical and Perioperative Sciences/ Surgery, Umeå University, Umeå,  
18  
19 8 Sweden

20  
21 9 2. Department of Surgery, University of Helsinki and Helsinki University Hospital, Helsinki,  
22  
23 10 Finland

24  
25 11 3. Department of Clinical Microbiology, Umeå University, Umeå, Sweden

26  
27 12 4. Department of Surgical and Perioperative Sciences/ Urology, Umeå University, Umeå,  
28  
29 13 Sweden

30  
31 14 5. Wallenberg Center for Molecular Medicine, Umeå University, Umeå Sweden

32  
33 15 6. Department of Urology, Sahlgrenska Center for Cancer Research, Institute of Clinical  
34  
35 16 Sciences, Sahlgrenska Academy, University of Gothenburg, Gothenburg, Sweden  
36  
37  
38  
39

40  
41  
42 18 \* Corresponding author:

43  
44 19 Anne-Marie Fors Connolly

45  
46 20 Department of Clinical Microbiology

47  
48 21 Umeå University

49  
50 22 901 85 Umeå

51  
52 23 Sweden

53  
54 24 E-mail: [anne-marie.fors.connolly@umu.se](mailto:anne-marie.fors.connolly@umu.se)

55  
56  
57  
58  
59  
60 25

1  
2  
3  
4  
5  
6  
7  
8  
9  
10  
11  
12  
13  
14  
15  
16  
17  
18  
19  
20  
21  
22  
23  
24  
25  
26  
27  
28  
29  
30  
31  
32  
33  
34  
35  
36  
37  
38  
39  
40  
41  
42  
43  
44  
45  
46  
47  
48  
49  
50  
51  
52  
53  
54  
55  
56  
57  
58  
59  
60

26 Number of words text: 1406

27 Number of words abstract: 298

For peer review only

1  
2  
3 **28 Abstract**  
4

5 **29 Objective:** Determine whether augmentation of oestrogen in post-menopausal women  
6  
7  
8 **30** decreases the risk of death following COVID-19.  
9

10 **31**  
11  
12 **32 Design:** Nationwide registry-based study in Sweden based on registries from The Swedish  
13  
14 **33** Public Health Agency (all individuals that tested positive for SARS-CoV-2); Statistics  
15  
16 **34** Sweden (socioeconomical variables) and the National Board of Health and Welfare (Causes  
17  
18 **35** of death).  
19  
20  
21

22 **36**  
23  
24 **37 Participants:** Postmenopausal women between 50 and 80 years of age with verified COVID-  
25  
26 **38** 19.  
27  
28

29 **39**  
30  
31 **40 Interventions:** Pharmaceutical modulation of oestrogen as defined by (1) women with  
32  
33 **41** previously diagnosed breast cancer and receiving endocrine therapy (decreased systemic  
34  
35 **42** oestrogen levels); (2) women receiving hormone replacement therapy (HRT; increased  
36  
37 **43** systemic oestrogen levels) and (3) a control group not fulfilling requirements for group 1 or 2  
38  
39 **44** (postmenopausal oestrogen levels). Adjustments were made for potential confounders such as  
40  
41 **45** age, annual disposable income (richest group as the reference category), highest level of  
42  
43 **46** education (primary, secondary and tertiary (reference)) and the weighted Charlson  
44  
45 **47** Comorbidity Index (wCCI).  
46  
47  
48

49 **49 Primary outcome measure:** Death following COVID-19.  
50  
51

52 **51 Results:** From a nationwide cohort consisting of 49,853 women diagnosed with COVID-19  
53  
54  
55  
56 **52** between February 4 and September 14, 2020 in Sweden, 16,693 were between 50 to 80 years  
57  
58  
59  
60

1  
2  
3 53 of age. We included 14,685 women in the study with 11,923 (81%) in the control group, 227  
4  
5 54 (2%) women in group 1 and 2,535 (17%) women in group 2. The unadjusted odds ratio (OR)  
6  
7  
8 55 for death following COVID-19 was 2.35 (95% CI 1.51-3.65) for group 1 and 0.45 (0.34-0.6)  
9  
10 56 for group 2. Only the adjusted OR for death remained significant for group 2 with OR 0.47  
11  
12 57 (0.34-0.63). Absolute risk (AR) of death was 4.6% for the control group vs 10.1% and 2.1%,  
13  
14 58 for the decreased and increased oestrogen groups, respectively. The risk of death due to  
15  
16  
17 59 COVID-19 was significantly associated with: age, OR 1.15 (1.14-1.17); annual income,  
18  
19 60 poorest 2.79 [1.96-3.97], poor 2.43 [1.71-3.46] and middle 1.64 [1.11-2.41]; and education  
20  
21 61 (primary 1.4 [1.07-1.81]) and wCCI 1.13 [1.1-1.16].  
22  
23  
24 62

25  
26 63 Conclusions: Oestrogen supplementation in post-menopausal women is associated with a  
27  
28 64 decreased risk of dying from COVID-19 in this nationwide cohort study. These findings are  
29  
30  
31 65 limited by the retrospective and non-randomized design. Further randomized intervention  
32  
33 66 trials are warranted.  
34  
35

36 67

### 38 39 68 **Strengths and limitations of the study**

- 40  
41  
42 69 • This study is based on all diagnosed COVID-19 patients in Sweden between February  
43  
44 70 1 and September 14, 2020  
45  
46  
47 71 • Swedish registry data is well-validated and due to historical registry data and cross-  
48  
49 72 linkage with the registries of Statistics Sweden, the confounding and/or effect-  
50  
51 73 modifying effects of socioeconomic variables and comorbidities could be adjusted for  
52  
53  
54 74 • The findings are limited by the retrospective and non-randomized design.  
55  
56 75 • Information regarding compliance to pharmaceutical modulation of oestrogen is  
57  
58 76 missing  
59  
60

- 1  
2  
3 77 • Information about the exact duration of the postmenopausal hormone therapy (HT)  
4  
5 78 was not available in the dataset  
6  
7  
8 79 • Circulating oestrogen levels are not measured  
9  
10  
11  
12  
13  
14  
15  
16  
17  
18  
19  
20  
21  
22  
23  
24  
25  
26  
27  
28  
29  
30  
31  
32  
33  
34  
35  
36  
37  
38  
39  
40  
41  
42  
43  
44  
45  
46  
47  
48  
49  
50  
51  
52  
53  
54  
55  
56  
57  
58  
59  
60

For peer review only

## 80 **Introduction**

81 The coronavirus disease 2019 (COVID-19) pandemic has swept across the globe causing  
82 enormous strain on societies and health care systems. Although women are infected, they  
83 appear to be protected from poor outcomes when compared with men even after adjustment  
84 for confounding risk factors<sup>1 2</sup>. Similar epidemiological findings have also been described  
85 for SARS-CoV and MERS-CoV infections<sup>3 4 5</sup>. This implies biological differences between  
86 the sexes in terms of sensitivity to severe COVID-19, and oestrogen has been identified as a  
87 potential therapeutic candidate.

88  
89 The majority of breast cancer (BC) patients have oestrogen receptor (ER)-positive cancer<sup>6</sup>  
90 and are usually given adjuvant endocrine therapy after surgery in order to reduce the risk of  
91 cancer recurrences, leading to *reduced* systemic oestrogen levels. On the other hand, systemic  
92 oestrogen levels are *augmented* in women taking postmenopausal hormone therapy (HT) to  
93 relieve menopausal symptoms<sup>7</sup>. In a nationwide cohort, we used the opposing effects of  
94 endocrine therapy in BC patients and women taking postmenopausal HT in modulating  
95 systemic oestrogen levels as a model to test the hypothesis that increased oestrogen levels  
96 are protective towards COVID-19 death.

1  
2  
3 97 **Materials and methods**  
4

5 98 *Patients and public involvement statement*  
6

7  
8 99 All data from the Swedish registries were pseudonymised and therefore patients were not  
9  
10 100 involved in the study.  
11

12 101

13  
14  
15 102 *Participants and sources of data*  
16

17 103 The personal identification numbers (PINs) from all diagnosed COVID-19 individuals in  
18  
19 104 Sweden (SmiNet) between the February 1 and September 14, 2020 were cross-linked with the  
20  
21 105 LISA Register (Longitudinal integrated database for health insurance and labour market  
22  
23 106 studies) administered by Statistics Sweden; and the following healthcare registers  
24  
25 107 administreed by the Swedish National Board of Health and Welfare: patient, cancer,  
26  
27 108 prescribed pharmaceutical, and causes of death. Post-menopausal women 50-80 years of age  
28  
29 109 were stratified into three groups as follows: Group 1, the *decreased oestrogen group*,  
30  
31 110 included patients with BC as identified by the International Classification of Diseases (ICD)  
32  
33 111 version 10 code C50, and the following treatments: tamoxifen or fulvestrant (anatomical  
34  
35 112 therapeutic chemical (ATC): L02BA01, L02BA03) or an aromatase inhibitor (AI; ATC  
36  
37 113 L02BG03, L02BG04, and L02BG06). Group 2, the *augmented oestrogen group*, included  
38  
39 114 those patients treated with drugs classified as postmenopausal hormone therapy (ATC codes  
40  
41 115 G03CA03, G03CA04, G03CC07, G03CX01, G03FA, and G03FB). All ATC codes for  
42  
43 116 groups 1 and 2 were identified from the Prescribed Pharmaceutical Register with at least two  
44  
45 117 consecutive withdrawals and at least one during the period extending from July 1, 2019 - to  
46  
47 118 the latest date. Group 3, the *native oestrogen (control) group*, included patients with no BC  
48  
49 119 diagnosis and no prescription of the above-mentioned pharmaceuticals at any time during  
50  
51 120 2019 and 2020. Ethical approval was granted by the Swedish Ethical Review Authority.  
52  
53  
54  
55  
56  
57  
58  
59  
60

121



1  
2  
3 122 *Outcome, confounders and effect modifiers*  
4

5 123 The outcome was death due to COVID-19, as identified by the ICD-10 code U07, as the main  
6  
7  
8 124 or contributing cause of death from the Cause of Death Register. Potential confounders and  
9  
10 125 effect modifiers were included in the model and consisted of the weighted Charlson  
11  
12 126 comorbidity index (wCCI)<sup>8</sup>, age at COVID-19 diagnosis, income (divided into quintiles with  
13  
14 127 the richest group as the reference) and education (primary, secondary and tertiary, which  
15  
16 128 served as the reference). The wCCI was calculated using the Patient and Cancer Registers, up  
17  
18  
19 129 to 2 months prior to the COVID-19 date in order not to include complications due to COVID-  
20  
21 130 19 as a comorbidity. If there was no information regarding diagnosis codes required for  
22  
23 131 wCCI scoring, the individual was assigned a wCCI of zero. Information regarding income  
24  
25 132 and education was retrieved from the LISA-register.  
26  
27  
28  
29

30

31 134 *Statistical methods*  
32

33 135 The distributions of continuous and categorical variables in the three groups were tested  
34  
35 136 using ANOVA and the  $\chi^2$  test, respectively. Each variable was then analysed with univariate  
36  
37 137 logistic regression models, followed by a multivariable regression model to compare the  
38  
39 138 control group with groups 1 and 2, respectively, and adjusting for confounders. The present  
40  
41 139 study evaluates specific outcomes, and the odds ratio and p-values are adjusted for relevant  
42  
43 140 confounders using the multivariate logistic regression model and there was no need to further  
44  
45 141 adjust using the Bonferroni/Benjamini/FDR approach. Descriptive analyses and logistic  
46  
47 142 regression models were performed using R statistical software version 4.0.2, using the *finalfit*  
48  
49  
50 143 package 1.0.2.  
51  
52  
53  
54  
55  
56  
57  
58  
59  
60

## 144 **Results**

### 145 *Participants*

146 During the study period a total of 49,853 women of all ages were diagnosed with COVID-19  
147 in Sweden, and a total of 14,685 women aged 50-80 years were included in our study (figure  
148 1). Characteristics of these groups are shown in table 1. Individuals with decreased oestrogen  
149 due to adjuvant endocrine therapy for BC (group 1) were older with a higher comorbidity  
150 index. A larger proportion of women in group 2 (increased levels of systemic oestrogen due  
151 to postmenopausal HT) had high income and a tertiary level of education (table 1).

### 153 *Oestrogen augmentation protects against death due to COVID-19*

154 Pharmaceutically decreasing systemic oestrogen levels increased the odds of dying due to  
155 COVID-19 (group 1: odds ratio [OR] 2.35, 95% confidence intervals [CI] 1.51 - 3.65), but  
156 following adjustment for confounders this association was no longer significant (figure 2).  
157 Interestingly, augmentation of systemic oestrogen levels decreased the odds of dying due to  
158 COVID-19, with OR 0.45 (95% CI 0.34 - 0.6), and this result remained significant even after  
159 adjustment for confounders (OR 0.47, 95% CI 0.34 - 0.63). The absolute risk (AR) of dying  
160 was 4.6% for the control group vs. 10.1% and 2.1% for the groups with decreased and  
161 increased oestrogen, respectively.

162  
163 As expected, higher age and wCCI increased the odds of dying due to COVID-19. For every  
164 year increase in age the odds of dying were 1.15 (95% CI 1.14-1.17), and for every increase  
165 in wCCI the odds of dying were 1.13 (95% CI 1.10-1.16) (figure 2). Furthermore, low  
166 income and having only primary education were also factors that increased the odds of dying  
167 due to COVID-19 (figure 2).

## 168 Discussion

### 169 Principal findings

170 The major finding of this nationwide registry-based study is that pharmaceutical  
171 augmentation of oestrogen levels is associated with decreased odds of death due to COVID-  
172 19 in postmenopausal women.

173

### 174 Comparison with related studies

175 There are several possible biological explanations for the lower risk experienced by women.  
176 These include mechanisms directly involved in viral internalization and reproduction, where  
177 oestrogen has been shown to decrease expression of vital proteins such as ACE2 and  
178 TMPRSS2<sup>9-11</sup>, inherent sex-linked differences in the immune system, and direct oestrogen  
179 effects<sup>12</sup>. As an example, Kalidhindi et al have studied the effect of testosterone and  
180 oestrogen on ACE2, a key cell entry for SARS-CoV-2 virus, using *in vitro* experiments on  
181 isolated human airway smooth muscle cells of male and female origin<sup>13</sup>. Most interestingly,  
182 they show that cells exposed to oestrogen and testosterone behave differently, as testosterone  
183 significantly upregulates ACE2 expression in cells from both sexes, whereas oestrogen  
184 downregulates ACE2<sup>13</sup>. ACE2 expression and differences in its expression in relation to sex  
185 could also be linked to the higher mortality in relation to hypertension, venous  
186 thromboembolism and SARS-CoV-2 infection between men and women<sup>14</sup>. Our findings are  
187 also supported by *in vitro* studies where 17 $\beta$ -oestradiol treatment reduced SARS-CoV-2 viral  
188 load<sup>9</sup>. Previous experimental studies in mice on SARS-CoV have, moreover, shown that  
189 female mice are less susceptible to infection and that this protection was lost upon  
190 oophorectomy, thus indicating a direct protective role of oestrogen signalling<sup>15</sup>. Furthermore,  
191 Barh et al., using a multiomics approach on SARS-CoV-2-infected host interactome,  
192 proteome, transcriptome, and bibliome datasets, demonstrated that oestrogen modulation

1  
2  
3 193 could be a potential therapeutic option in COVID-19<sup>16</sup>. Our results are in line with those by  
4  
5 194 Seeland et al using real world evidence from multiple institutions and the TriNetX platform.  
6  
7  
8 195 They found by using propensity score matched analysis of data for women aged 50 and above  
9  
10 196 with COVID-19 (n=439), that there was a survival benefit for oestradiol hormone-users  
11  
12 197 versus non-users (OR 0.33 (95%CI 0.18-0.62)). Although based on a large real-world dataset  
13  
14 198 the risk of selection bias was more difficult to discern since the cohort was neither  
15  
16  
17 199 population-based nor adjusted for central confounders although likely mitigated by the  
18  
19 200 propensity score matched analysis<sup>17</sup>. In our study the effect of increased systemic oestrogen  
20  
21 201 levels on reducing the risk of COVID-19 death remained significant after adjusting for  
22  
23 202 education level and income, both factors known to influence COVID-19 outcome<sup>18</sup>, further  
24  
25 203 supporting the protective role of oestrogen in women. Adjusting for income and education is  
26  
27 204 important as we have previously shown the how these affect the risk of dying due to COVID-  
28  
29 205 19 in Sweden<sup>19</sup>.  
30  
31  
32  
33 206 The hypothetical inverse, a worsening effect of reduced systemic oestrogen levels in women  
34  
35 207 with a previous BC receiving adjuvant endocrine therapy, was initially significant but not  
36  
37 208 after adjusting for confounders. This population differs from the control group in that they all  
38  
39 209 have been diagnosed with BC and it has been shown that patients, both men and women, with  
40  
41 210 any cancer are harder hit by COVID-19<sup>20</sup>. However, in a previous study BC patients were  
42  
43 211 shown to be healthier compared with the background population in terms of ischemic cardiac  
44  
45 212 disease and CCI<sup>21</sup>, and the wCCI adjustments may therefore overcompensate for this cancer-  
46  
47 213 related vulnerability. Although not significant, a trend towards worse outcome remained and  
48  
49 214 thus a larger population of BC patients on endocrine therapy is likely needed to verify the  
50  
51 215 finding. Thus, this study cannot exclude an increased risk of death from COVID-19 if  
52  
53 216 systemic oestrogen levels are pharmaceutically decreased.  
54  
55  
56  
57  
58 217  
59  
60

1  
2  
3 218 Strengths and limitations  
4

5 219 The strengths of this study are that this is a nationwide cohort in a country with high COVID-  
6  
7 220 19 incidence using well validated registry data. A weakness is that the level of oestrogen  
8  
9 221 modulation cannot be exactly measured in each individual, and that the number of BC  
10  
11 222 women on anti-oestrogen medication ended up being too small to show significance although  
12  
13 223 there was a clear trend. Furthermore, we do not have data on the exact duration of  
14  
15 224 postmenopausal HT for the individuals. The postmenopausal HT group, however, proved  
16  
17 225 large enough to show the clear protective effect. A further limitation is that confounding  
18  
19 226 factors such as body mass index (BMI), nutrition and smoking habits are not available in the  
20  
21 227 nationwide registry data.  
22  
23  
24  
25

26 228

27  
28 229 Implications and conclusion  
29

30 230 This study shows an association between oestrogen levels and COVID-19 death.  
31  
32 231 Consequently, drugs increasing oestrogen levels may have a role in therapeutic efforts to  
33  
34 232 alleviate COVID-19 severity in post-menopausal women and could be studied in randomized  
35  
36 233 control trials.  
37  
38  
39  
40  
41  
42  
43  
44  
45  
46  
47  
48  
49  
50  
51  
52  
53  
54  
55  
56  
57  
58  
59  
60

1  
2  
3 234 **Acknowledgments:**  
4

5 235 We would like to thank Wolfgang Lohr for data management and Dr- Chloé Jacquet for  
6  
7 236 helping us design figure 2.  
8  
9

10 237

11  
12 238 **Funding:**  
13

14 239 This study was funded by:

15  
16 240 AMFC: Central ALF-funding, Region Västerbotten (RV-836351), Base unit ALF-funding

17  
18 241 (RV-939769); Strategic Funding during 2020 from the Department of Clinical Microbiology,

19  
20 242 Umeå University; Stroke Research in Northern Sweden; and Molecular Infection Medicine

21  
22 243 Sweden (MIMS).  
23

24 244 AJ: the Knut and Alice Wallenberg Foundation  
25

26 245  
27  
28  
29

30 246 **Contributors**  
31

32 247 MS and KW conceptualized the study. MS and AMFC designed the study. OFR and AMFC

33 248 prepared the study data. OFR performed the statistical analysis. MS, OFR, KW, AJ and

34 249 AMFC all contributed to interpretation of the results. MS wrote the first draft of the

35 250 manuscript. MS, OFR, KW, AJ and AMFC contributed to critical revision of the manuscript.

36 251 MS, OFR, KW, AJ and AMFC approved the final manuscript. AMFC is the guarantor of this

37 252 study. The corresponding author attests that all authors meet the criteria for authorship and

38 253 that all have been included.  
39

40 254  
41  
42  
43

44 255 **Competing interests**  
45

46 256 All authors have completed the ICMJE uniform disclosure form at

47 257 [www.icmje.org/coi\\_disclosure.pdf](http://www.icmje.org/coi_disclosure.pdf) and declare: no support from any organisation for the

48 258 submitted work, no financial relationships with any organisations that might have an interest  
49  
50  
51  
52  
53  
54  
55  
56  
57  
58  
59  
60

1  
2  
3 259 in the submitted work in the previous three years, and no other relationships or activities that  
4  
5 260 could appear to have influenced the submitted work.  
6  
7

8 261

9  
10 262 **Ethical approval**

11  
12 263 Ethical approval was obtained by the Swedish Ethical Review Authority (number 2020-  
13  
14 264 02150)  
15  
16

17 265

18  
19 266 **Data sharing**

20  
21 267 The study protocol (R script) is available upon request. The study used secondary registry  
22  
23 268 data that are regulated by the Public Access to Information and Secrecy Act (2009:400) and  
24  
25 269 are protected by strict confidentiality. For the purpose of research though, after formal  
26  
27 270 application to access personal data the responsible authority can grant access to data, though  
28  
29 271 this is contingent on vetting by the Ethical Review Authority of Sweden, according to the Act  
30  
31 272 (2003:460) concerning the Ethical Review of Research Involving Humans. This means that  
32  
33 273 the aggregated registry data cannot be shared.  
34  
35  
36  
37  
38  
39  
40  
41  
42  
43  
44  
45  
46  
47  
48  
49  
50  
51  
52  
53  
54  
55  
56  
57  
58  
59  
60

275

276 **References**

- 277 1. Williamson EJ, Walker AJ, Bhaskaran K, et al. Factors associated with COVID-19-related death  
 278 using OpenSAFELY. *Nature* 2020;584(7821):430-36. doi: 10.1038/s41586-020-2521-4
- 279 2. Abate BB, Kassie AM, Kassaw MW, et al. Sex difference in coronavirus disease (COVID-19): a  
 280 systematic review and meta-analysis. *BMJ Open* 2020;10(10):e040129. doi:  
 281 10.1136/bmjopen-2020-040129 [published Online First: 2020/10/09]
- 282 3. Alghamdi IG, Hussain, II, Almalki SS, et al. The pattern of Middle East respiratory syndrome  
 283 coronavirus in Saudi Arabia: a descriptive epidemiological analysis of data from the Saudi  
 284 Ministry of Health. *Int J Gen Med* 2014;7:417-23. doi: 10.2147/IJGM.S67061 [published  
 285 Online First: 2014/09/05]
- 286 4. Leong HN, Earnest A, Lim HH, et al. SARS in Singapore--predictors of disease severity. *Ann Acad*  
 287 *Med Singap* 2006;35(5):326-31. [published Online First: 2006/07/11]
- 288 5. Karlberg J, Chong DS, Lai WY. Do men have a higher case fatality rate of severe acute respiratory  
 289 syndrome than women do? *Am J Epidemiol* 2004;159(3):229-31. doi: 10.1093/aje/kwh056  
 290 [published Online First: 2004/01/27]
- 291 6. Sung H, Ferlay J, Siegel RL, et al. Global cancer statistics 2020: GLOBOCAN estimates of incidence  
 292 and mortality worldwide for 36 cancers in 185 countries. *CA Cancer J Clin* 2021 doi:  
 293 10.3322/caac.21660
- 294 7. Delgado BJ, Lopez-Ojeda W. Estrogen. StatPearls. Treasure Island (FL)2021.
- 295 8. Ludvigsson JF, Appelros P, Askling J, et al. Adaptation of the Charlson Comorbidity Index for  
 296 Register-Based Research in Sweden. *Clin Epidemiol* 2021;13:21-41. doi:  
 297 10.2147/CLEP.S282475
- 298 9. Lemes RMR, Costa AJ, Bartolomeo CS, et al. 17beta-estradiol reduces SARS-CoV-2 infection in  
 299 vitro. *Physiol Rep* 2021;9(2):e14707. doi: 10.14814/phy2.14707
- 300 10. Stelzig KE, Canepa-Escaro F, Schiliro M, et al. Estrogen regulates the expression of SARS-CoV-2  
 301 receptor ACE2 in differentiated airway epithelial cells. *Am J Physiol Lung Cell Mol Physiol*  
 302 2020;318(6):L1280-L81. doi: 10.1152/ajplung.00153.2020
- 303 11. Young MJ, Clyne CD, Chapman KE. Endocrine aspects of ACE2 regulation: RAAS, steroid  
 304 hormones and SARS-CoV-2. *J Endocrinol* 2020;247(2):R45-R62. doi: 10.1530/JOE-20-0260  
 305 [published Online First: 2020/09/24]
- 306 12. Klein SL, Flanagan KL. Sex differences in immune responses. *Nat Rev Immunol* 2016;16(10):626-  
 307 38. doi: 10.1038/nri.2016.90
- 308 13. Kalidhindi RSR, Borkar NA, Ambhore NS, et al. Sex steroids skew ACE2 expression in human  
 309 airway: a contributing factor to sex differences in COVID-19? *Am J Physiol Lung Cell Mol*  
 310 *Physiol* 2020;319(5):L843-L47. doi: 10.1152/ajplung.00391.2020 [published Online First:  
 311 2020/10/01]
- 312 14. La Vignera S, Cannarella R, Condorelli RA, et al. Sex-Specific SARS-CoV-2 Mortality: Among  
 313 Hormone-Modulated ACE2 Expression, Risk of Venous Thromboembolism and  
 314 Hypovitaminosis D. *Int J Mol Sci* 2020;21(8) doi: 10.3390/ijms21082948 [published Online  
 315 First: 2020/04/26]
- 316 15. Channappanavar R, Fett C, Mack M, et al. Sex-Based Differences in Susceptibility to Severe Acute  
 317 Respiratory Syndrome Coronavirus Infection. *J Immunol* 2017;198(10):4046-53. doi:  
 318 10.4049/jimmunol.1601896 [published Online First: 2017/04/05]
- 319 16. Barh D, Tiwari S, Weener ME, et al. Multi-omics-based identification of SARS-CoV-2 infection  
 320 biology and candidate drugs against COVID-19. *Comput Biol Med* 2020;126:104051. doi:  
 321 10.1016/j.compbiomed.2020.104051
- 322 17. Seeland U, Coluzzi F, Simmaco M, et al. Evidence for treatment with estradiol for women with  
 323 SARS-CoV-2 infection. *BMC Med* 2020;18(1):369. doi: 10.1186/s12916-020-01851-z



- 1  
2  
3 324 18. Drefahl S, Wallace M, Mussino E, et al. A population-based cohort study of socio-demographic  
4 325 risk factors for COVID-19 deaths in Sweden. *Nat Commun* 2020;11(1):5097. doi:  
5 326 10.1038/s41467-020-18926-3  
6 327 19. Gustafsson PE, San Sebastian M, Fonseca-Rodriguez O, et al. Inequitable impact of infection:  
7 328 social gradients in severe COVID-19 outcomes among all confirmed SARS-CoV-2 cases during  
8 329 the first pandemic wave in Sweden. *J Epidemiol Community Health* 2021 doi: 10.1136/jech-  
9 330 2021-216778 [published Online First: 2021/09/17]  
10 331 20. Zhang H, Han H, He T, et al. Clinical Characteristics and Outcomes of COVID-19-Infected Cancer  
11 332 Patients: A Systematic Review and Meta-Analysis. *J Natl Cancer Inst* 2020 doi:  
12 333 10.1093/jnci/djaa168  
13 334 21. Wennstig AK, Wadsten C, Garmo H, et al. Long-term risk of ischemic heart disease after adjuvant  
14 335 radiotherapy in breast cancer: results from a large population-based cohort. *Breast Cancer*  
15 336 *Res* 2020;22(1):10. doi: 10.1186/s13058-020-1249-2

18 337  
19  
20  
21  
22  
23  
24  
25  
26  
27  
28  
29  
30  
31  
32  
33  
34  
35  
36  
37  
38  
39  
40  
41  
42  
43  
44  
45  
46  
47  
48  
49  
50  
51  
52  
53  
54  
55  
56  
57  
58  
59  
60

1  
2  
3 338 **Figure legends**  
4

5 339 Figure 1: Flow chart of the study  
6  
7

8 340

9  
10 341 Figure 2: Oestrogen augmentation is associated with decreased odds of dying due to COVID-

11  
12 342 19. Crude and adjusted logistic regression models. Statistical significance: \* $p < 0.05$ , \*\* $p <$

13  
14 343  $0.01$ , \*\*\* $p < 0.001$ ). OR, odds ratio; CI, confidence intervals; wCCI, weighted Charlson

15  
16  
17 344 Comorbidity Index.  
18  
19  
20  
21  
22  
23  
24  
25  
26  
27  
28  
29  
30  
31  
32  
33  
34  
35  
36  
37  
38  
39  
40  
41  
42  
43  
44  
45  
46  
47  
48  
49  
50  
51  
52  
53  
54  
55  
56  
57  
58  
59  
60

For peer review only

345 **Table 1.** Characteristics of the study population

| Variable                       |           | Native oestrogen (control group) | Decreased oestrogen (group 1) | Augmented oestrogen (group 2) | p-value |
|--------------------------------|-----------|----------------------------------|-------------------------------|-------------------------------|---------|
| <b>Total N (%)</b>             |           | 11923 (81.2)                     | 227 (1.5)                     | 2535 (17.3)                   |         |
| <b>Deaths</b>                  | No        | 11377 (95.4)                     | 204 (89.9)                    | 2481 (97.9)                   | <0.001  |
|                                | Yes       | 546 (4.6)                        | 23 (10.1)                     | 54 (2.1)                      |         |
| <b>Age</b>                     | Mean (SD) | 61.2 (8.3)                       | 64.4 (8.9)                    | 60.9 (7.7)                    | <0.001  |
| <b>wCCI</b>                    | Mean (SD) | 1.4 (2.4)                        | 5.0 (3.3)                     | 1.6 (2.5)                     | <0.001  |
| <b>Income quintiles, n (%)</b> | Richest   | 3422 (28.7)                      | 64 (28.2)                     | 937 (37.0)                    | <0.001  |
|                                | Rich      | 2743 (23.0)                      | 42 (18.5)                     | 605 (23.9)                    |         |
|                                | Middle    | 2120 (17.8)                      | 35 (15.4)                     | 404 (15.9)                    |         |
|                                | Poor      | 1703 (14.3)                      | 47 (20.7)                     | 334 (13.2)                    |         |
|                                | Poorest   | 1903 (16.0)                      | 39 (17.2)                     | 253 (10.0)                    |         |
|                                | Missing   | 32 (0.3)                         | 0 (0)                         | 2 (0.1)                       |         |
| <b>Education, n (%)</b>        | Tertiary  | 4186 (35.1)                      | 82 (36.1)                     | 1074 (42.4)                   | <0.001  |
|                                | Secondary | 5609 (47.0)                      | 97 (42.7)                     | 1150 (45.4)                   |         |
|                                | Primary   | 1882 (15.8)                      | 45 (19.8)                     | 290 (11.4)                    |         |
|                                | Missing   | 246 (2.1)                        | 3 (1.3)                       | 21 (0.8)                      |         |

346 wCCI: Weighted Charlson Comorbidity Index. SD standard deviation

Figure 1

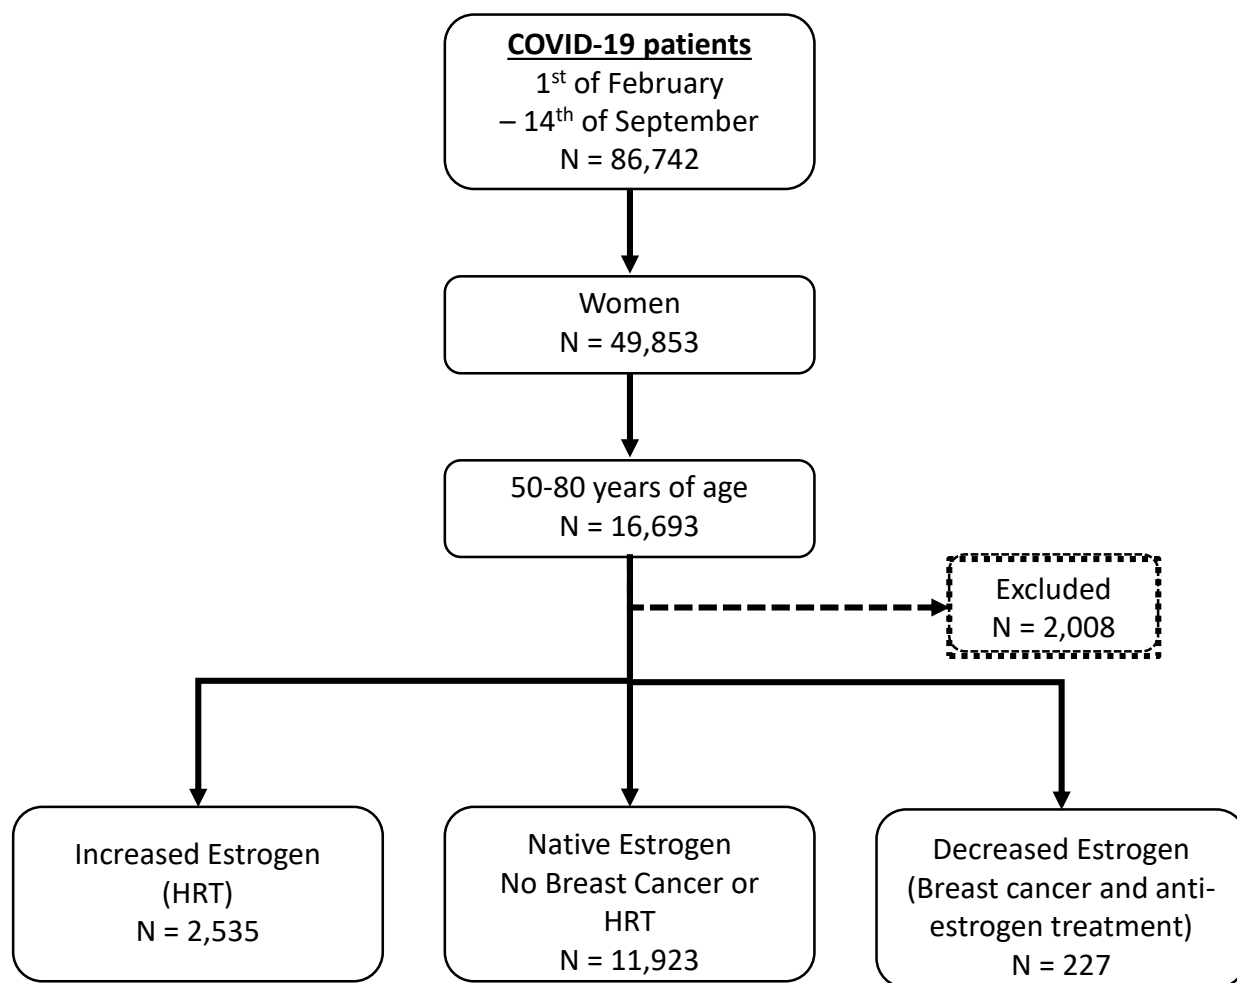

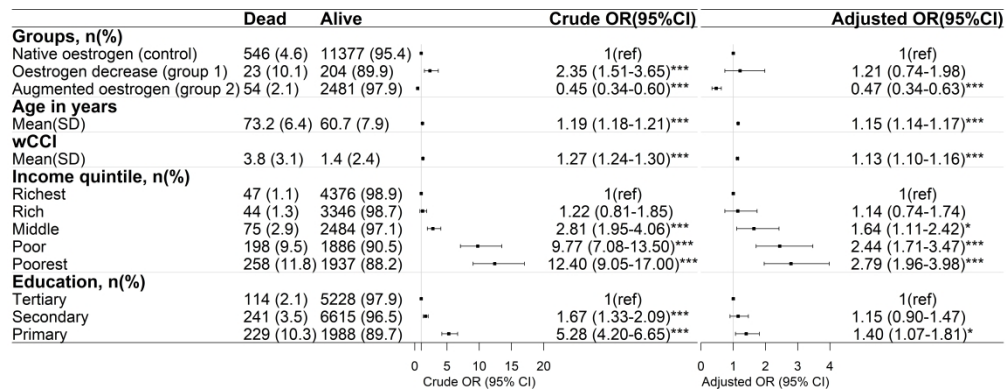

Figure 2

393x152mm (600 x 600 DPI)

STROBE Statement—Checklist of items that should be included in reports of *cohort studies*

|                              | Item No | Recommendation                                                                                                                                                                                                                                                                                                                                                                                                                                                |
|------------------------------|---------|---------------------------------------------------------------------------------------------------------------------------------------------------------------------------------------------------------------------------------------------------------------------------------------------------------------------------------------------------------------------------------------------------------------------------------------------------------------|
| <b>Title and abstract</b>    | 1       | (a) Indicate the study's design with a commonly used term in the title or the abstract.<br><i>"Association between pharmaceutical modulation of oestrogen in postmenopausal women in Sweden with death due to COVID-19 – a cohort study". Page 1, line 1-2</i><br>(b) Provide in the abstract an informative and balanced summary of what was done and what was found. <i>Page 3-4, line 28-62</i>                                                            |
| <b>Introduction</b>          |         |                                                                                                                                                                                                                                                                                                                                                                                                                                                               |
| Background/rationale         | 2       | Explain the scientific background and rationale for the investigation being reported. <i>Page 5, lines 75-90.</i>                                                                                                                                                                                                                                                                                                                                             |
| Objectives                   | 3       | State specific objectives, including any prespecified hypotheses. <i>Page 5, lines 87-90</i>                                                                                                                                                                                                                                                                                                                                                                  |
| <b>Methods</b>               |         |                                                                                                                                                                                                                                                                                                                                                                                                                                                               |
| Study design                 | 4       | Present key elements of study design early in the paper. <i>Page 6-7, lines 91-134</i>                                                                                                                                                                                                                                                                                                                                                                        |
| Setting                      | 5       | Describe the setting, locations, and relevant dates, including periods of recruitment, exposure, follow-up, and data collection. <i>Page 6, lines 96-114</i>                                                                                                                                                                                                                                                                                                  |
| Participants                 | 6       | (a) Give the eligibility criteria, and the sources and methods of selection of participants. Describe methods of follow-up. <i>Page 6, lines 96-114</i><br>(b) For matched studies, give matching criteria and number of exposed and unexposed. <i>Not applicable.</i>                                                                                                                                                                                        |
| Variables                    | 7       | Clearly define all outcomes, exposures, predictors, potential confounders, and effect modifiers. Give diagnostic criteria, if applicable. <i>Page 7, lines 116-126</i>                                                                                                                                                                                                                                                                                        |
| Data sources/<br>measurement | 8*      | For each variable of interest, give sources of data and details of methods of assessment (measurement). Describe comparability of assessment methods if there is more than one group. <i>Page 6-7, lines 91-134</i>                                                                                                                                                                                                                                           |
| Bias                         | 9       | Describe any efforts to address potential sources of bias. <i>Not applicable.</i>                                                                                                                                                                                                                                                                                                                                                                             |
| Study size                   | 10      | Explain how the study size was arrived at. <i>Page 6-7, lines 91-134</i>                                                                                                                                                                                                                                                                                                                                                                                      |
| Quantitative variables       | 11      | Explain how quantitative variables were handled in the analyses. If applicable, describe which groupings were chosen and why. <i>Page 6-7, lines 91-134</i>                                                                                                                                                                                                                                                                                                   |
| Statistical methods          | 12      | (a) Describe all statistical methods, including those used to control for confounding. <i>Page 7, lines 128-134</i><br>(b) Describe any methods used to examine subgroups and interactions. <i>Page 6-7, lines 91-134</i><br>(c) Explain how missing data were addressed. <i>Case only method.</i><br>(d) If applicable, explain how loss to follow-up was addressed. <i>Not applicable.</i><br>(e) Describe any sensitivity analyses. <i>Not applicable.</i> |
| <b>Results</b>               |         |                                                                                                                                                                                                                                                                                                                                                                                                                                                               |
| Participants                 | 13*     | (a) Report numbers of individuals at each stage of study—eg numbers potentially eligible, examined for eligibility, confirmed eligible, included in the study, completing follow-up, and analysed. <i>Page 8, lines 135-142</i><br>(b) Give reasons for non-participation at each stage. <i>Not applicable.</i><br>(c) Consider use of a flow diagram. <i>Figure 1.</i>                                                                                       |
| Descriptive data             | 14*     | (a) Give characteristics of study participants (eg demographic, clinical, social) and information on exposures and potential confounders. <i>Page 8, lines 135-142, Table 1</i>                                                                                                                                                                                                                                                                               |

1  
2  
3  
4  
5  
6  
7  
8  
9  
10  
11  
12  
13  
14  
15  
16  
17  
18  
19  
20  
21  
22  
23  
24  
25  
26  
27  
28  
29  
30  
31  
32  
33  
34  
35  
36  
37  
38  
39  
40  
41  
42  
43  
44  
45  
46  
47  
48  
49  
50  
51  
52  
53  
54  
55  
56  
57  
58  
59  
60

(b) Indicate number of participants with missing data for each variable of interest.

*Table 1.*

(c) Summarise follow-up time (eg, average and total amount). *Not applicable.*

|                          |     |                                                                                                                                                                                                                                                                                                                                                                                                                                                                                                               |
|--------------------------|-----|---------------------------------------------------------------------------------------------------------------------------------------------------------------------------------------------------------------------------------------------------------------------------------------------------------------------------------------------------------------------------------------------------------------------------------------------------------------------------------------------------------------|
| Outcome data             | 15* | Report numbers of outcome events or summary measures over time. <i>Page 8, lines 144-158.</i>                                                                                                                                                                                                                                                                                                                                                                                                                 |
| Main results             | 16  | (a) Give unadjusted estimates and, if applicable, confounder-adjusted estimates and their precision (eg, 95% confidence interval). Make clear which confounders were adjusted for and why they were included. <i>Page 8, lines 144-158. Figure 2.</i><br>(b) Report category boundaries when continuous variables were categorized. <i>Not applicable.</i><br>(c) If relevant, consider translating estimates of relative risk into absolute risk for a meaningful time period. <i>Page 8, lines 150-152.</i> |
| Other analyses           | 17  | Report other analyses done—eg analyses of subgroups and interactions, and sensitivity analyses. <i>Page 8, lines 154-158.</i>                                                                                                                                                                                                                                                                                                                                                                                 |
| <b>Discussion</b>        |     |                                                                                                                                                                                                                                                                                                                                                                                                                                                                                                               |
| Key results              | 18  | Summarise key results with reference to study objectives. <i>Page 9, lines 160-163.</i>                                                                                                                                                                                                                                                                                                                                                                                                                       |
| Limitations              | 19  | Discuss limitations of the study, taking into account sources of potential bias or imprecision. Discuss both direction and magnitude of any potential bias. <i>Page 11, lines 209-217.</i>                                                                                                                                                                                                                                                                                                                    |
| Interpretation           | 20  | Give a cautious overall interpretation of results considering objectives, limitations, multiplicity of analyses, results from similar studies, and other relevant evidence. <i>Page 11, lines 219-223.</i>                                                                                                                                                                                                                                                                                                    |
| Generalisability         | 21  | Discuss the generalisability (external validity) of the study results. <i>Page 9-10, lines 165-207</i>                                                                                                                                                                                                                                                                                                                                                                                                        |
| <b>Other information</b> |     |                                                                                                                                                                                                                                                                                                                                                                                                                                                                                                               |
| Funding                  | 22  | Give the source of funding and the role of the funders for the present study and, if applicable, for the original study on which the present article is based. <i>Page 12, lines 228-234.</i>                                                                                                                                                                                                                                                                                                                 |

\*Give information separately for exposed and unexposed groups.

**Note:** An Explanation and Elaboration article discusses each checklist item and gives methodological background and published examples of transparent reporting. The STROBE checklist is best used in conjunction with this article (freely available on the Web sites of PLoS Medicine at <http://www.plosmedicine.org/>, Annals of Internal Medicine at <http://www.annals.org/>, and Epidemiology at <http://www.epidem.com/>). Information on the STROBE Initiative is available at <http://www.strobe-statement.org>.
